# Supplementary material for: Norsesquiterpenoids from the octocoral Paralemnalia thyrsoides (Ehrenberg 1834)
Source: Royal Society of Chemistry journal article supplement (doi:10.1039/d2ra05015c), 2022-01-01
Supplement: d2ra05015c1.pdf [file d2ra05015c1.pdf]

## Table of Content

|                    |                                                                                                                                                     |    |
|--------------------|-----------------------------------------------------------------------------------------------------------------------------------------------------|----|
| <b>Figure S1.</b>  | HRESI-MS spectrum of compound <b>1</b> .....                                                                                                        | 2  |
| <b>Figure S2.</b>  | <sup>1</sup> H-NMR spectrum (400 MHz, CDCl <sub>3</sub> ) of compound <b>1</b> .....                                                                | 2  |
| <b>Figure S3.</b>  | Expanded <sup>1</sup> H-NMR spectrum (0.90~2.80 ppm) of compound <b>1</b> .....                                                                     | 3  |
| <b>Figure S4.</b>  | <sup>13</sup> C-NMR spectrum (100 MHz, CDCl <sub>3</sub> ) of compound <b>1</b> .....                                                               | 3  |
| <b>Figure S5.</b>  | DEPT spectrum of compound <b>1</b> .....                                                                                                            | 4  |
| <b>Figure S6.</b>  | HSQC spectrum of compound <b>1</b> .....                                                                                                            | 4  |
| <b>Figure S7.</b>  | <sup>1</sup> H- <sup>1</sup> H COSY spectrum of compound <b>1</b> .....                                                                             | 5  |
| <b>Figure S8.</b>  | HMBC spectrum of compound <b>1</b> .....                                                                                                            | 5  |
| <b>Figure S9.</b>  | Expanded HMBC spectrum of compound <b>1</b> .....                                                                                                   | 6  |
| <b>Figure S10.</b> | NOESY spectrum of compound <b>1</b> .....                                                                                                           | 6  |
| <b>Figure S11.</b> | DP4+ analysis result of <b>1</b> -1 <i>S</i> ,4 <i>S</i> ,5 <i>R</i> ,6 <i>R</i> and <b>1</b> -1 <i>R</i> ,4 <i>S</i> ,5 <i>R</i> ,6 <i>R</i> ..... | 7  |
| <b>Figure S12.</b> | HRESI-MS spectrum of compound <b>2</b> .....                                                                                                        | 8  |
| <b>Figure S13.</b> | <sup>1</sup> H-NMR spectrum (400 MHz, CDCl <sub>3</sub> ) of compound <b>2</b> .....                                                                | 8  |
| <b>Figure S14.</b> | Expanded <sup>1</sup> H-NMR spectrum (1.10~3.00 ppm) of compound <b>2</b> .....                                                                     | 9  |
| <b>Figure S15.</b> | <sup>13</sup> C-NMR spectrum (100 MHz, CDCl <sub>3</sub> ) of compound <b>2</b> .....                                                               | 9  |
| <b>Figure S16.</b> | HSQC spectrum of compound <b>2</b> .....                                                                                                            | 10 |
| <b>Figure S17.</b> | Expanded HSQC spectrum of compound <b>2</b> .....                                                                                                   | 10 |
| <b>Figure S18.</b> | <sup>1</sup> H- <sup>1</sup> H COSY spectrum of compound <b>2</b> .....                                                                             | 11 |
| <b>Figure S19.</b> | HMBC spectrum of compound <b>2</b> .....                                                                                                            | 11 |
| <b>Figure S20.</b> | Expanded HMBC spectrum of compound <b>2</b> .....                                                                                                   | 12 |
| <b>Figure S21.</b> | Expanded HMBC spectrum of compound <b>2</b> .....                                                                                                   | 12 |
| <b>Figure S22.</b> | NOESY spectrum of compound <b>2</b> .....                                                                                                           | 13 |
| <b>Figure S23.</b> | DP4+ analysis result of <b>2</b> -1 <i>R</i> ,4 <i>S</i> ,5 <i>R</i> ,6 <i>R</i> and <b>2</b> -1 <i>S</i> ,4 <i>S</i> ,5 <i>R</i> ,6 <i>R</i> ..... | 13 |
| <b>Figure S24.</b> | ESI-MS spectrum of compound <b>3</b> .....                                                                                                          | 14 |
| <b>Figure S25.</b> | <sup>1</sup> H-NMR spectrum (400 MHz, CDCl <sub>3</sub> ) of compound <b>3</b> .....                                                                | 15 |
| <b>Figure S26.</b> | <sup>13</sup> C-NMR spectrum (100 MHz, CDCl <sub>3</sub> ) of compound <b>3</b> .....                                                               | 15 |
| <b>Figure S27.</b> | The <sup>1</sup> H-NMR spectrum of <b>1</b> at 0°C .....                                                                                            | 16 |
| <b>Figure S28.</b> | The <sup>1</sup> H-NMR spectrum of <b>1</b> at 25°C .....                                                                                           | 16 |
| <b>Figure S29.</b> | The <sup>1</sup> H-NMR spectrum of <b>1</b> at 50°C .....                                                                                           | 17 |
| <b>Table S1.</b>   | DP4+ analysis results of compounds <b>1</b> and <b>2</b> .....                                                                                      | 18 |
| <b>Table S2.</b>   | Experimental and calculated specific optical rotation values of compounds <b>1</b> and <b>2</b> .....                                               | 18 |
| <b>Table S3.</b>   | Optimized conformational search results of <b>1</b> .....                                                                                           | 19 |
| <b>Table S4.</b>   | Optimized conformational search results of <b>2</b> .....                                                                                           | 23 |
| <b>Table S5.</b>   | X-ray crystallographic data of compound <b>3</b> .....                                                                                              | 26 |

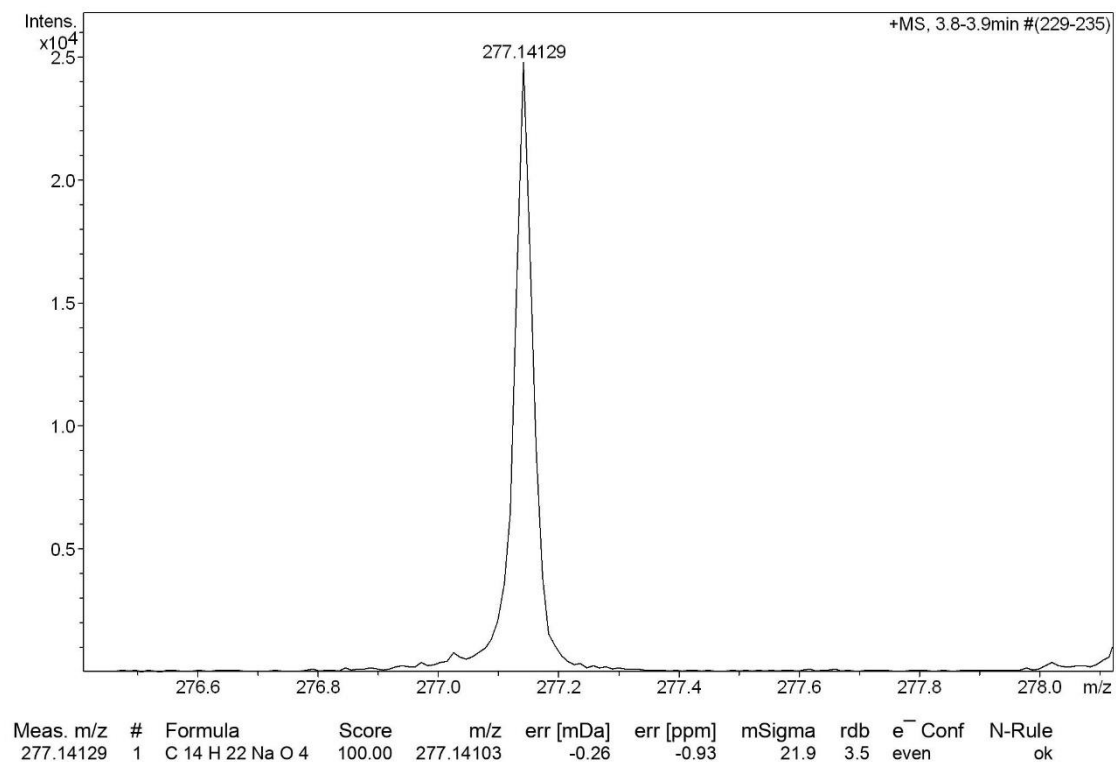

**Figure S1.** HRESI-MS spectrum of compound 1.

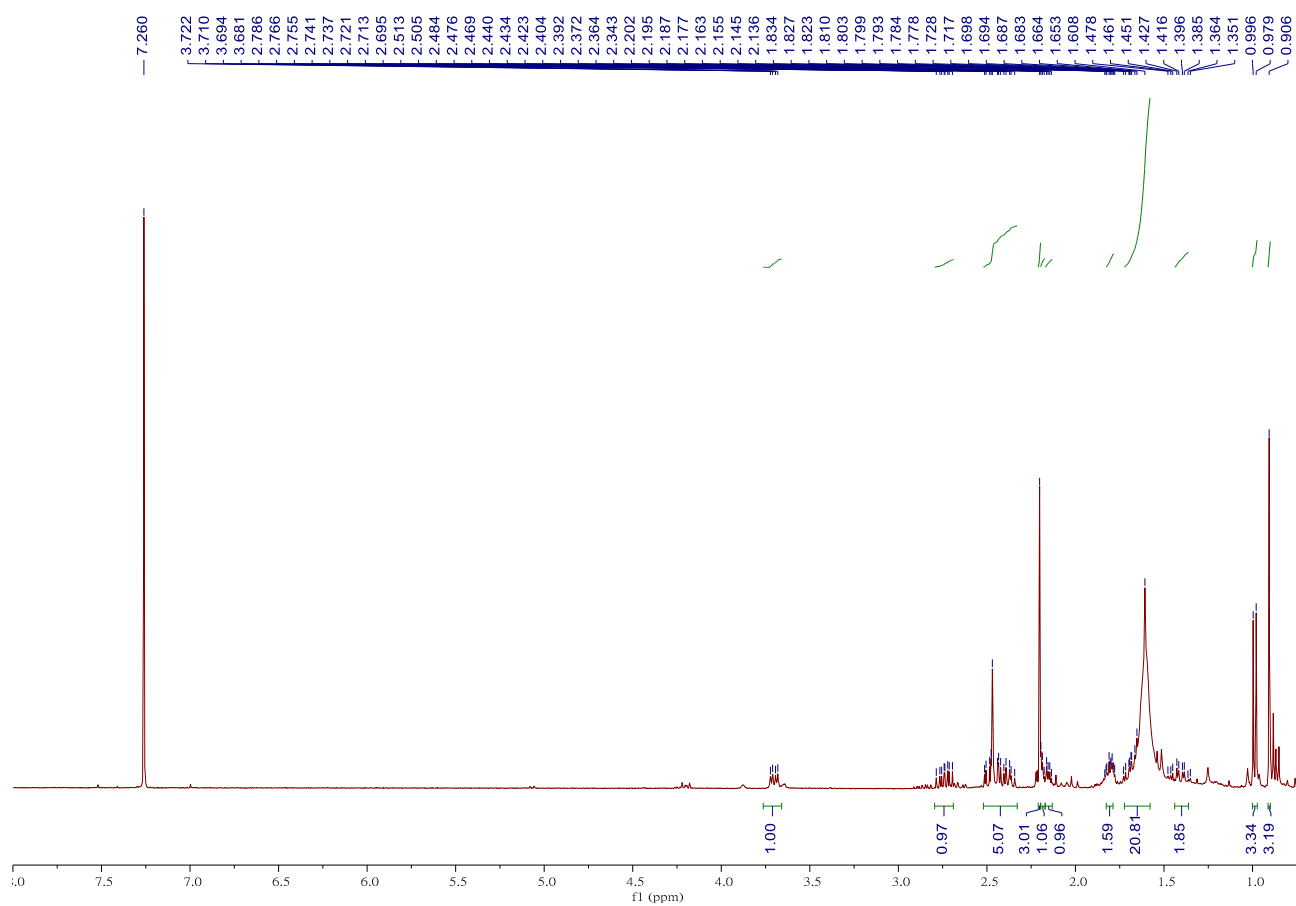

**Figure S2.** <sup>1</sup>H-NMR spectrum (400 MHz, CDCl<sub>3</sub>) of compound 1.

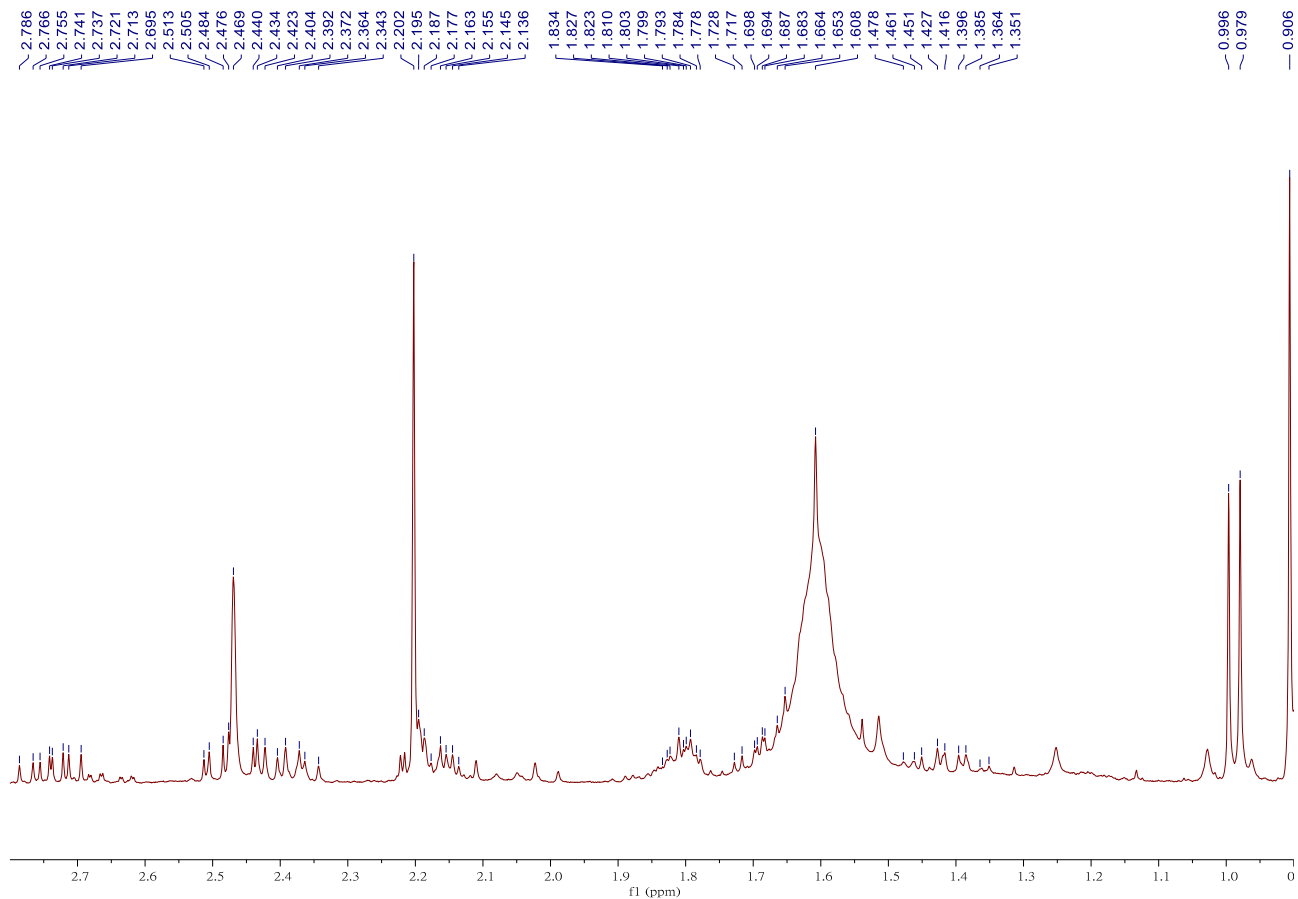

**Figure S3.** Expanded  $^1\text{H-NMR}$  spectrum (0.90~2.80 ppm) of compound **1**.

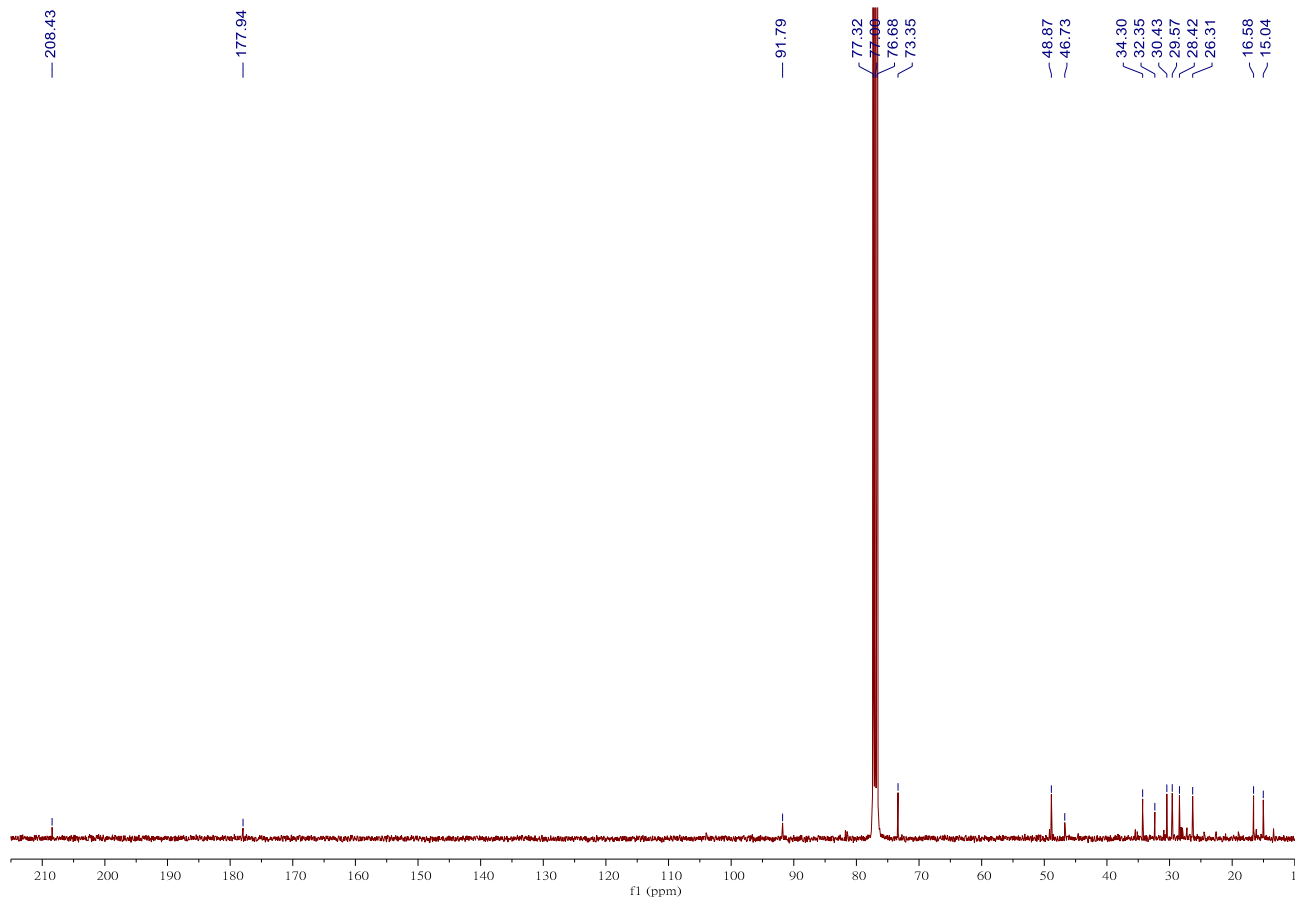

**Figure S4.**  $^{13}\text{C-NMR}$  spectrum (100 MHz,  $\text{CDCl}_3$ ) of compound **1**.

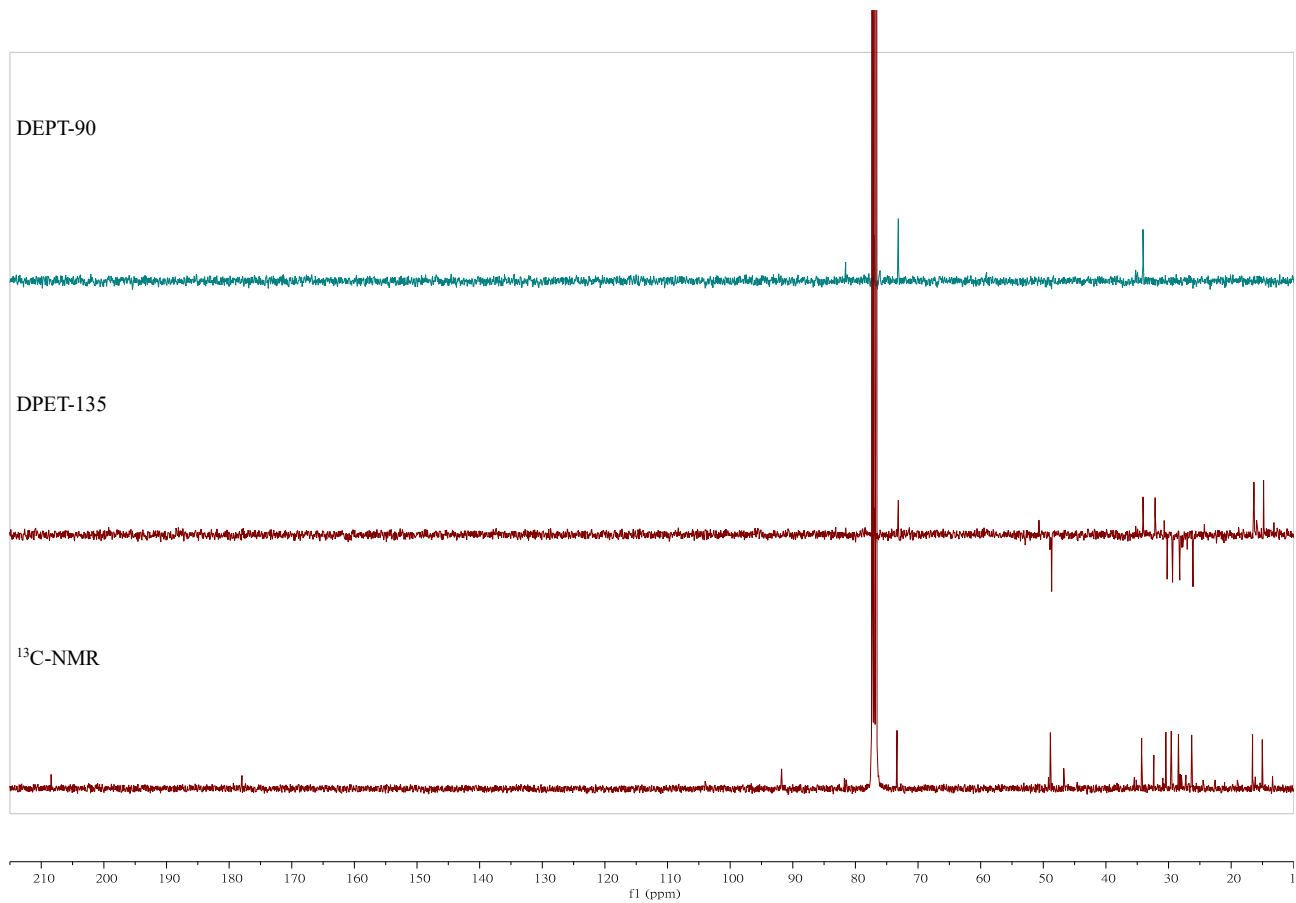

**Figure S5.** DEPT spectrum of compound **1**.

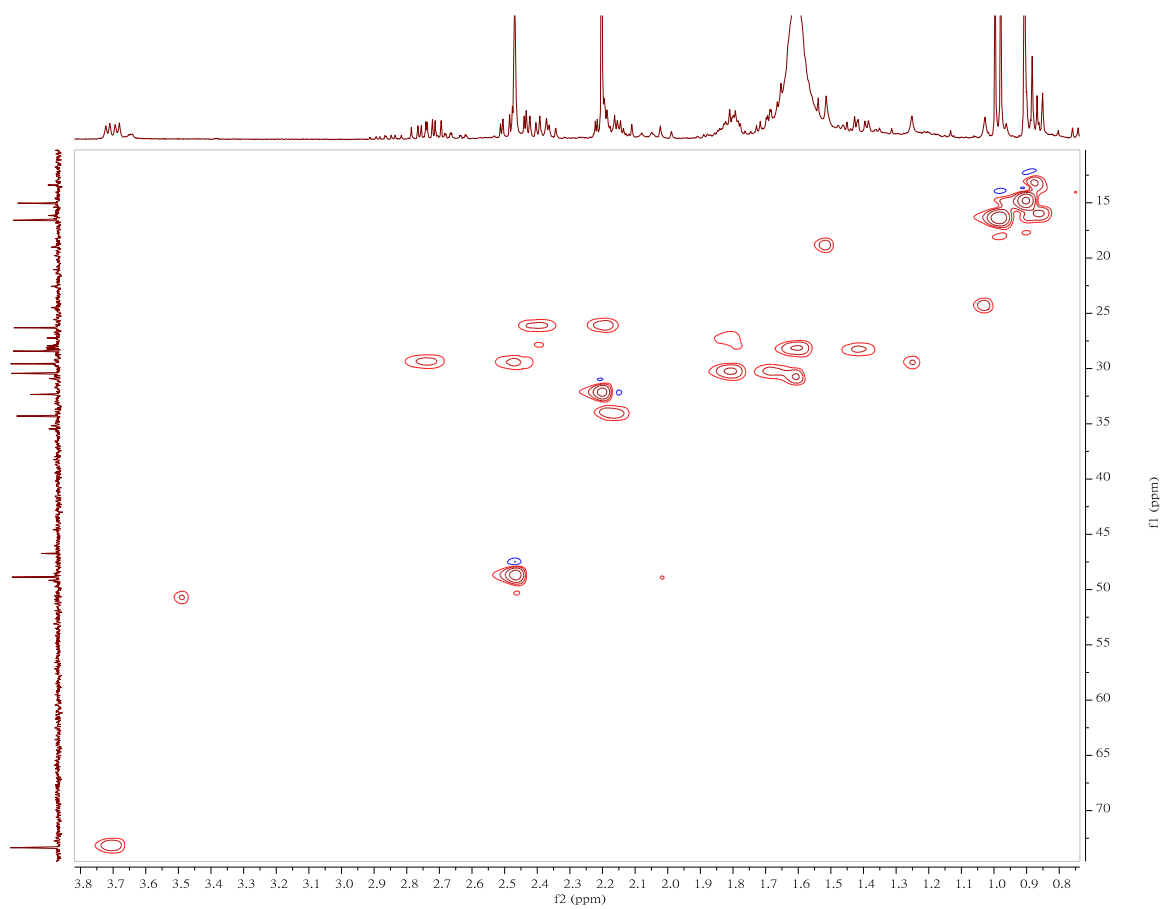

**Figure S6.** HSQC spectrum of compound **1**.

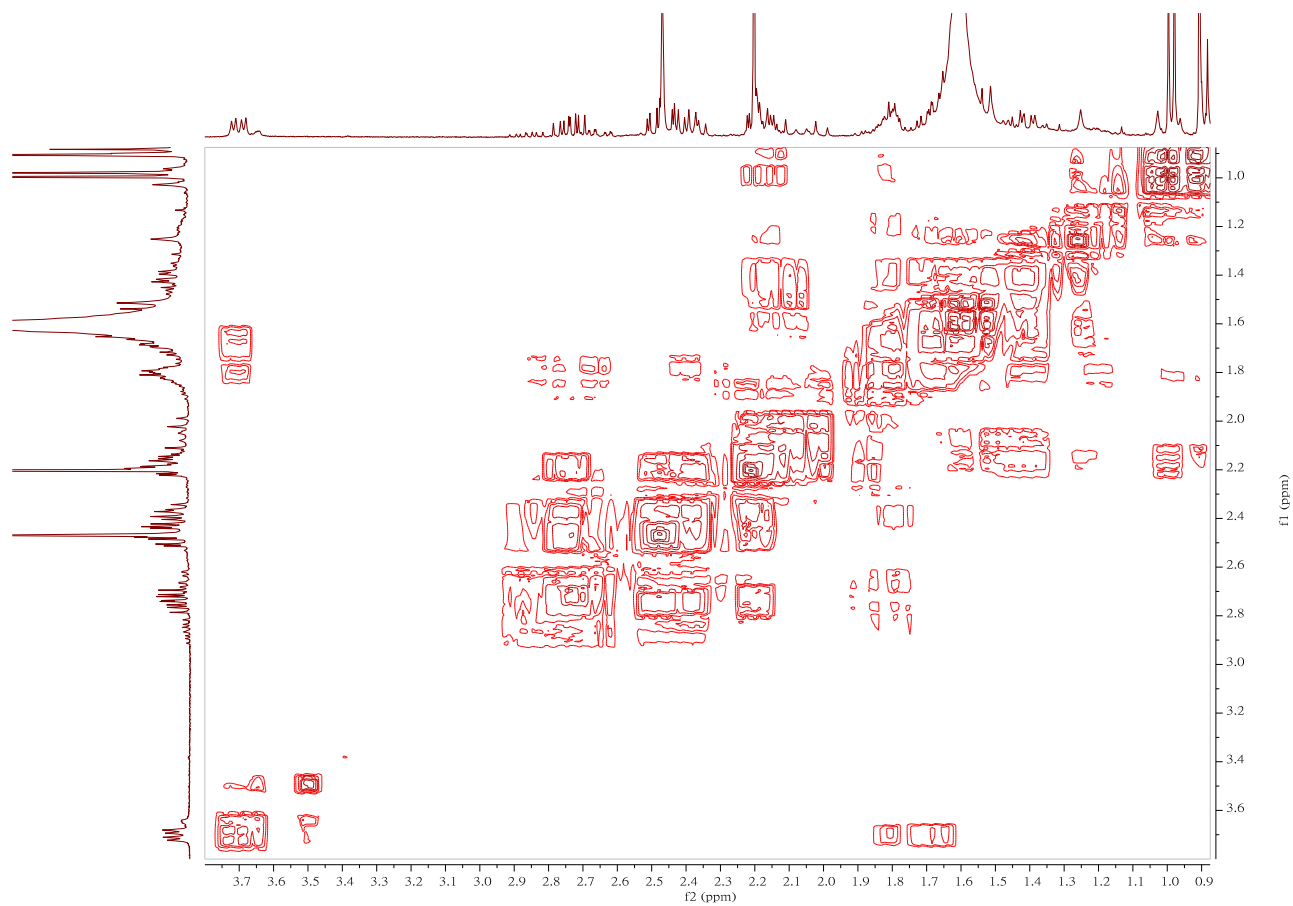

**Figure S7.**  $^1\text{H}$ - $^1\text{H}$  COSY spectrum of compound **1**.

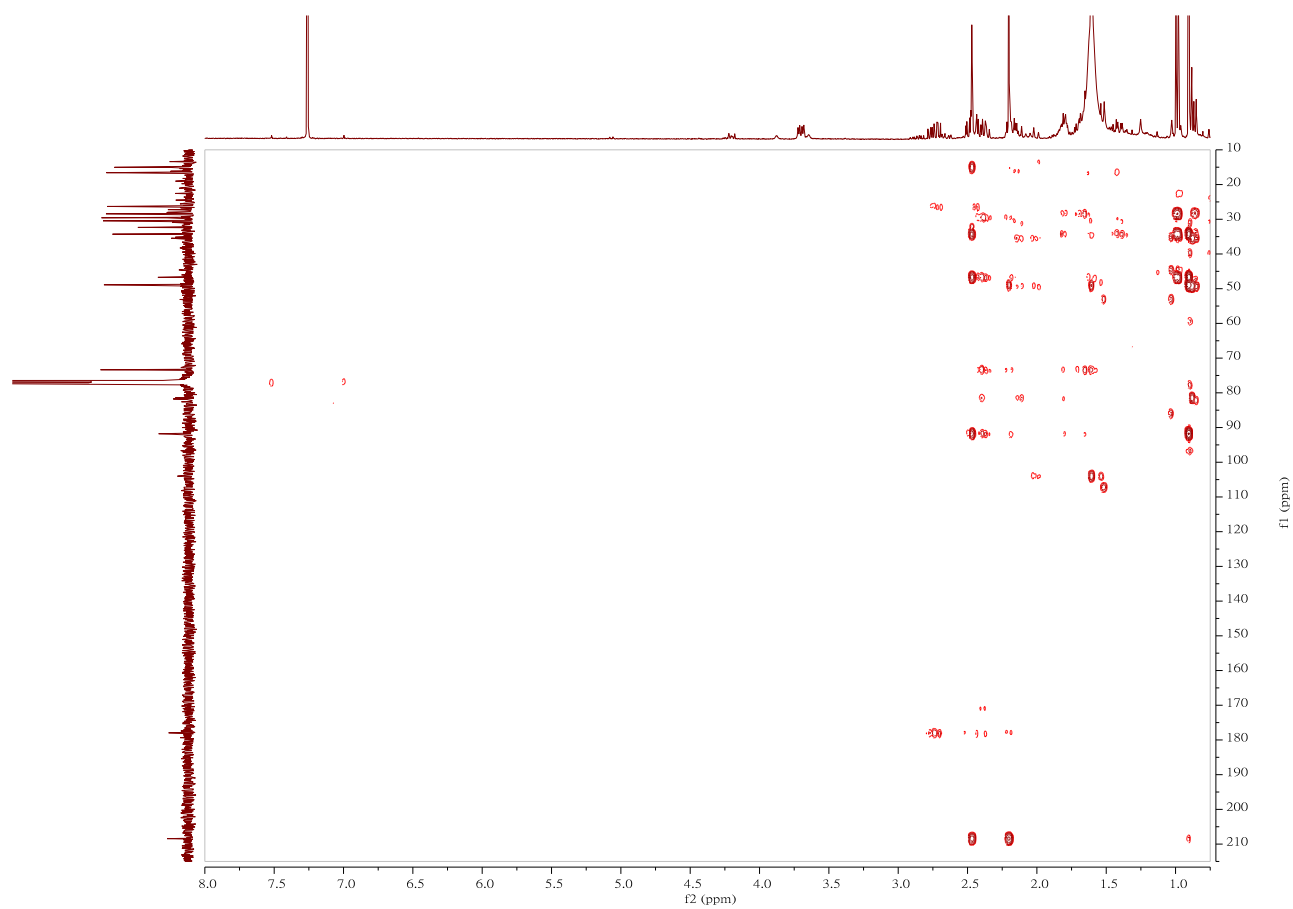

**Figure S8.** HMBC spectrum of compound **1**.

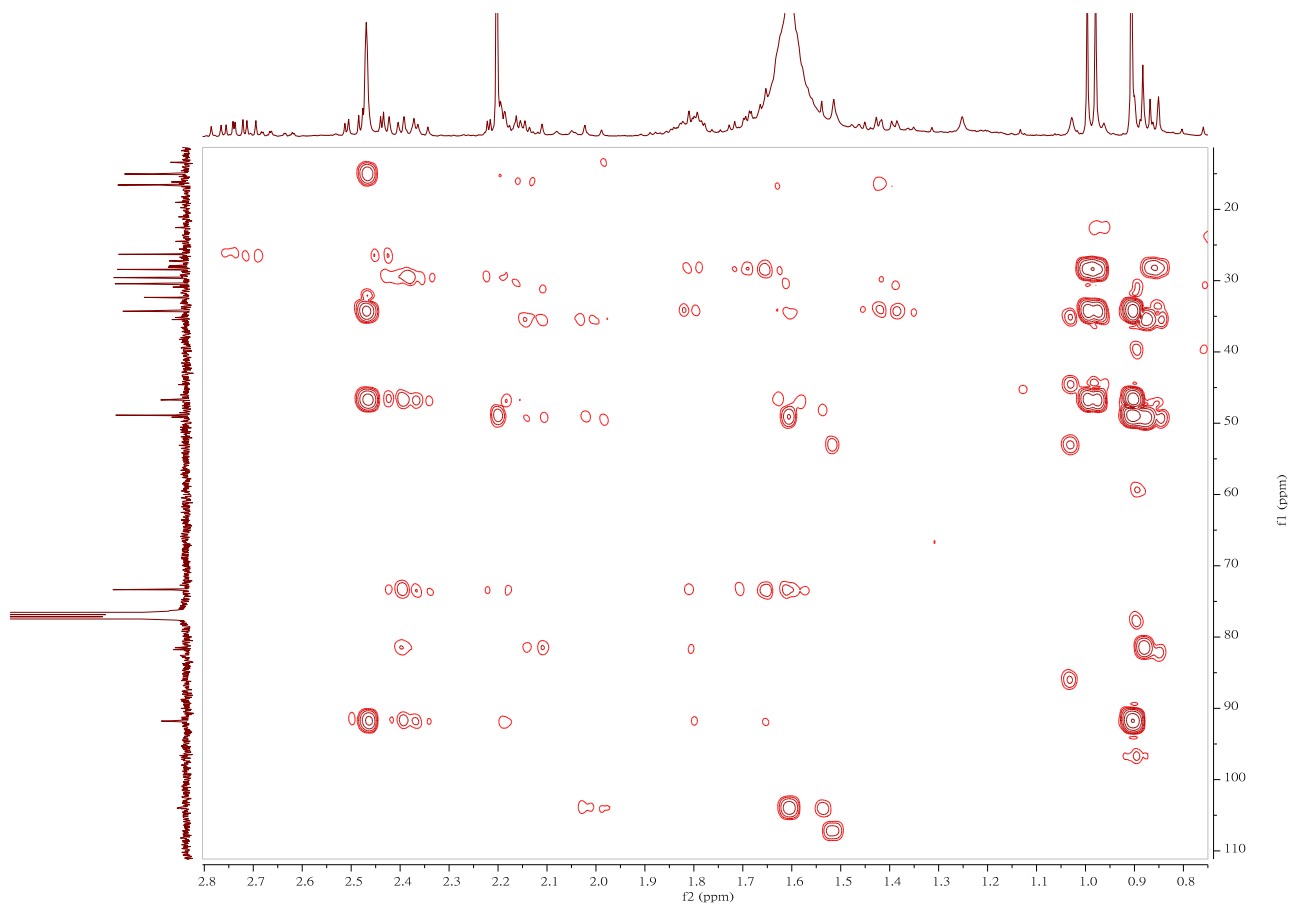

**Figure S9.** Expanded HMBC spectrum of compound **1**.

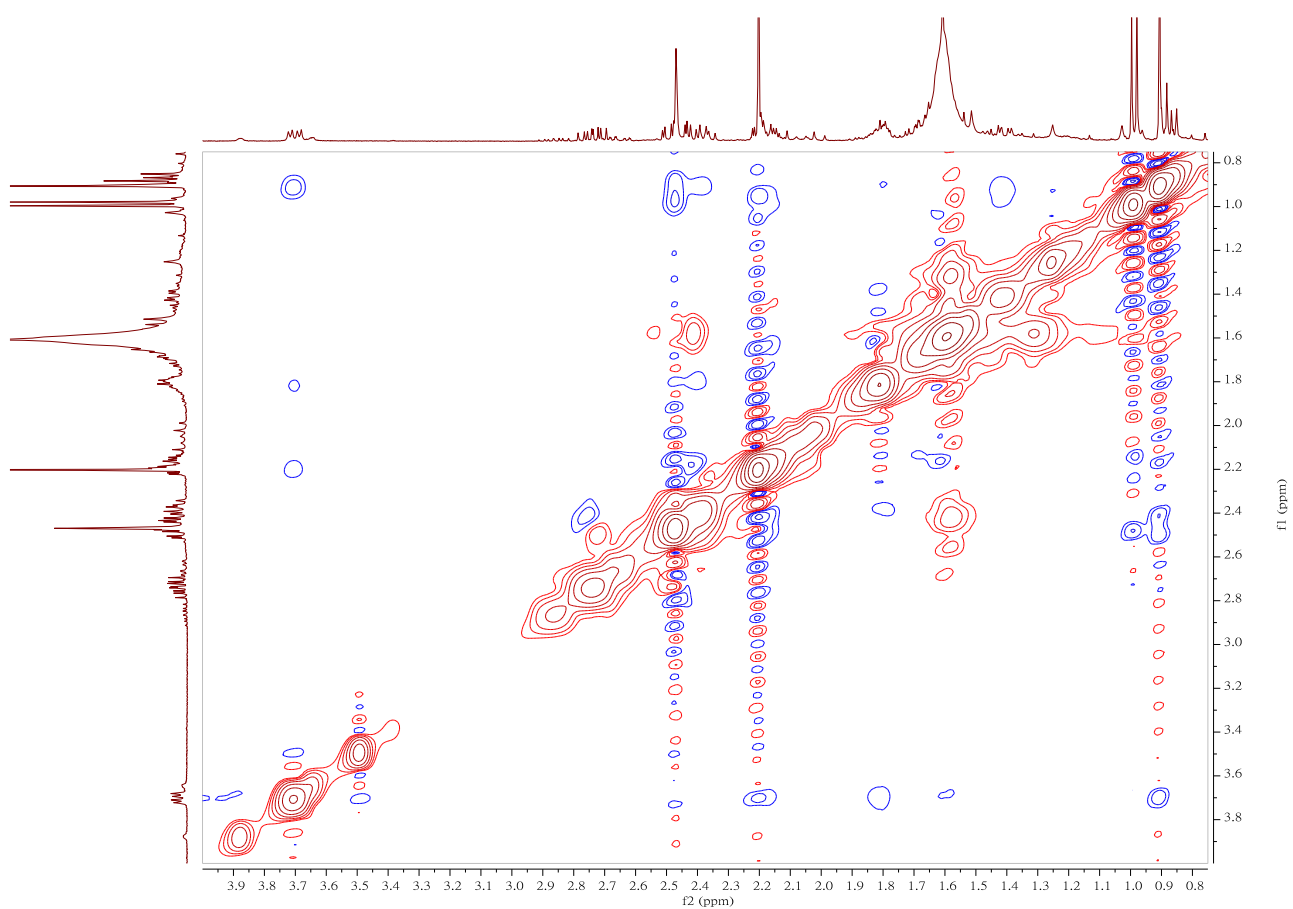

**Figure S10.** NOESY spectrum of compound **1**.

| Functional | Solvent? | Basis Set    | Type of Data      |          |          |          |          |  |
|------------|----------|--------------|-------------------|----------|----------|----------|----------|--|
| mPW1PW91   | PCM      | 6-311+G(d,p) | Shielding Tensors |          |          |          |          |  |
| Nuclei     | sp27     | DP4+         |                   | 0.00,00% |          | 0.00%    |          |  |
|            |          | Experimental | Isomer 1          | Isomer 2 | Isomer 3 | Isomer 4 | Isomer 5 |  |
| a          | 232.4    | 24.4         | 23.8              |          |          |          |          |  |
| x          | 177.9    | 0.9          | 2.3               |          |          |          |          |  |
|            | 51.8     | 52.2         | 91.6              |          |          |          |          |  |
|            | 73.4     | 109.9        | 111.8             |          |          |          |          |  |
|            | 49.9     | 138.8        | 139.2             |          |          |          |          |  |
|            | 49.7     | 134.1        | 135.5             |          |          |          |          |  |
|            | 34.3     | 147.6        | 146.8             |          |          |          |          |  |
|            | 50.4     | 156.0        | 156.5             |          |          |          |          |  |
|            | 32.3     | 151.7        | 151.3             |          |          |          |          |  |
|            | 29.5     | 153.9        | 154.4             |          |          |          |          |  |
|            | 28.4     | 156.4        | 156.0             |          |          |          |          |  |
|            | 26.3     | 155.57       | 160.31            |          |          |          |          |  |
|            | 15       | 172.73       | 171.14            |          |          |          |          |  |
|            | 16.5     | 169.17       | 169.64            |          |          |          |          |  |
|            | 3.7      | 22.96        | 22.74             |          |          |          |          |  |
| H          | 1.81     | 30.12        | 28.99             |          |          |          |          |  |
| H          | 1.69     | 30.14        | 30.17             |          |          |          |          |  |
| H          | 1.61     | 30.27        | 31.29             |          |          |          |          |  |
| H          | 1.41     | 30.26        | 31.07             |          |          |          |          |  |
| H          | 2.17     | 29.79        | 28.47             |          |          |          |          |  |
| H          | 2.74     | 29.02        | 29.18             |          |          |          |          |  |
| H          | 2.47     | 29.51        | 29.43             |          |          |          |          |  |
| H          | 2.37     | 29.33        | 29.59             |          |          |          |          |  |
| H          | 2.19     | 29.57        | 29.70             |          |          |          |          |  |
| H          | 2.47     | 29.38        | 29.30             |          |          |          |          |  |
| H          | 2.47     | 29.728004    | 28.222938         |          |          |          |          |  |
| H          | 2.3      | 29.3461387   | 29.4924026        |          |          |          |          |  |
| H          | 0.99     | 30.6851046   | 30.67451077       |          |          |          |          |  |
| H          | 0.91     | 30.7998508   | 30.6181446        |          |          |          |          |  |

  

| 1  | Functional       | Solvent? | Basis Set    | Type of Data      |          |          |          |          |          |  |
|----|------------------|----------|--------------|-------------------|----------|----------|----------|----------|----------|--|
| 2  | mPW1PW91         | PCM      | 6-311+G(d,p) | Shielding Tensors |          |          |          |          |          |  |
| 3  |                  |          |              |                   |          |          |          |          |          |  |
| 4  |                  |          |              | Isomer 1          | Isomer 2 | Isomer 3 | Isomer 4 | Isomer 5 | Isomer 6 |  |
| 5  | sDP4+ (H data)   |          |              | -                 | -        | -        | -        | -        | -        |  |
| 6  | sDP4+ (C data)   |          |              | -                 | -        | -        | -        | -        | -        |  |
| 7  | sDP4+ (all data) |          |              | -                 | -        | -        | -        | -        | -        |  |
| 8  | uDP4+ (H data)   |          |              | -                 | -        | -        | -        | -        | -        |  |
| 9  | uDP4+ (C data)   |          |              | -                 | -        | -        | -        | -        | -        |  |
| 10 | uDP4+ (all data) |          |              | -                 | -        | -        | -        | -        | -        |  |
| 11 | DP4+ (H data)    |          |              | -                 | -        | -        | -        | -        | -        |  |
| 12 | DP4+ (C data)    |          |              | -                 | -        | -        | -        | -        | -        |  |
| 13 | DP4+ (all data)  |          |              | -                 | -        | -        | -        | -        | -        |  |

Isomer 1: 1-1*S*,4*S*,5*R*,6*R*; Isomer 2: 1-1*R*,4*S*,5*R*,6*R*.

**Figure S11.** DP4+ analysis result of 1-1*S*,4*S*,5*R*,6*R* and 1-1*R*,4*S*,5*R*,6*R*.

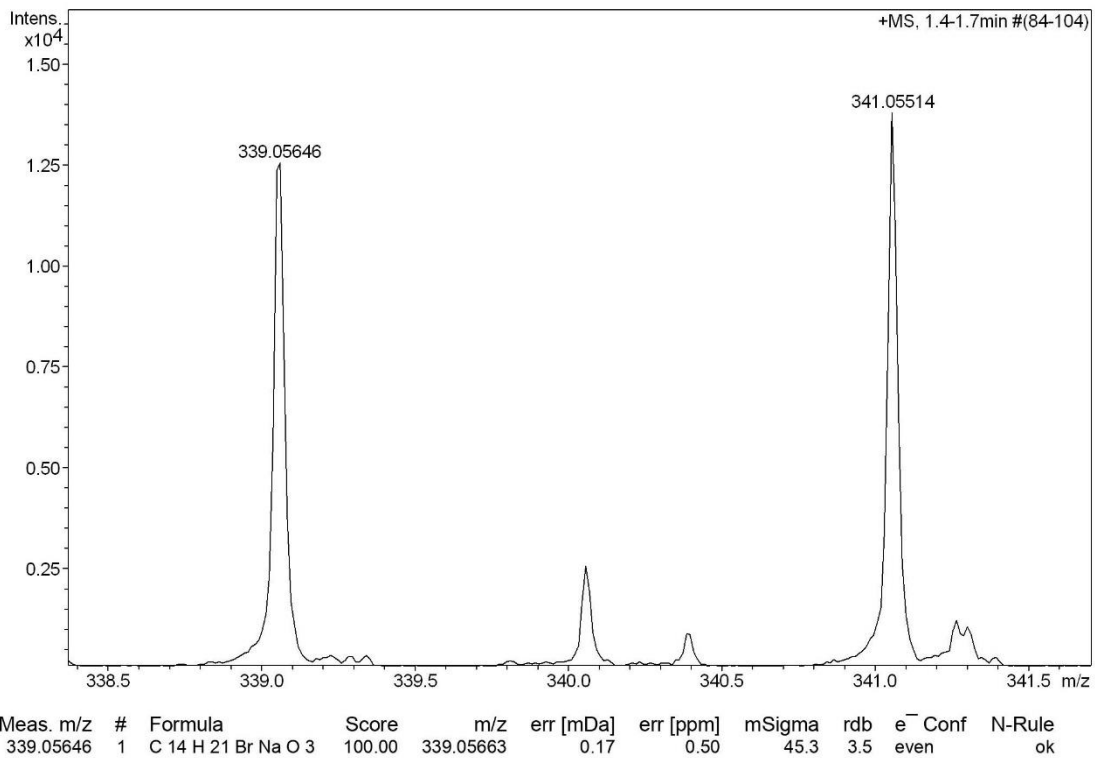

**Figure S12.** HRESI-MS spectrum of compound **2**.

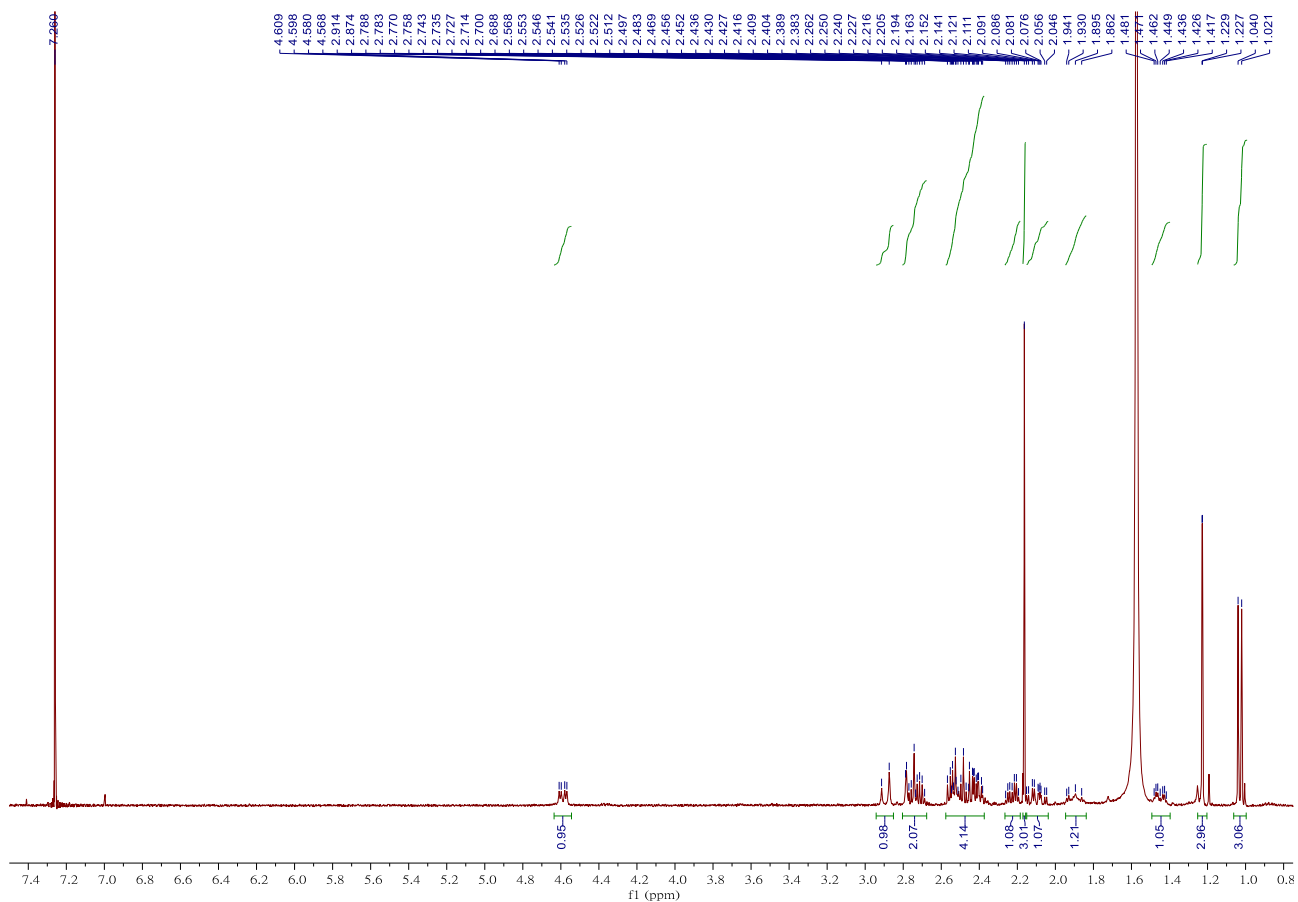

**Figure S13.** <sup>1</sup>H-NMR spectrum (400 MHz, CDCl<sub>3</sub>) of compound **2**.



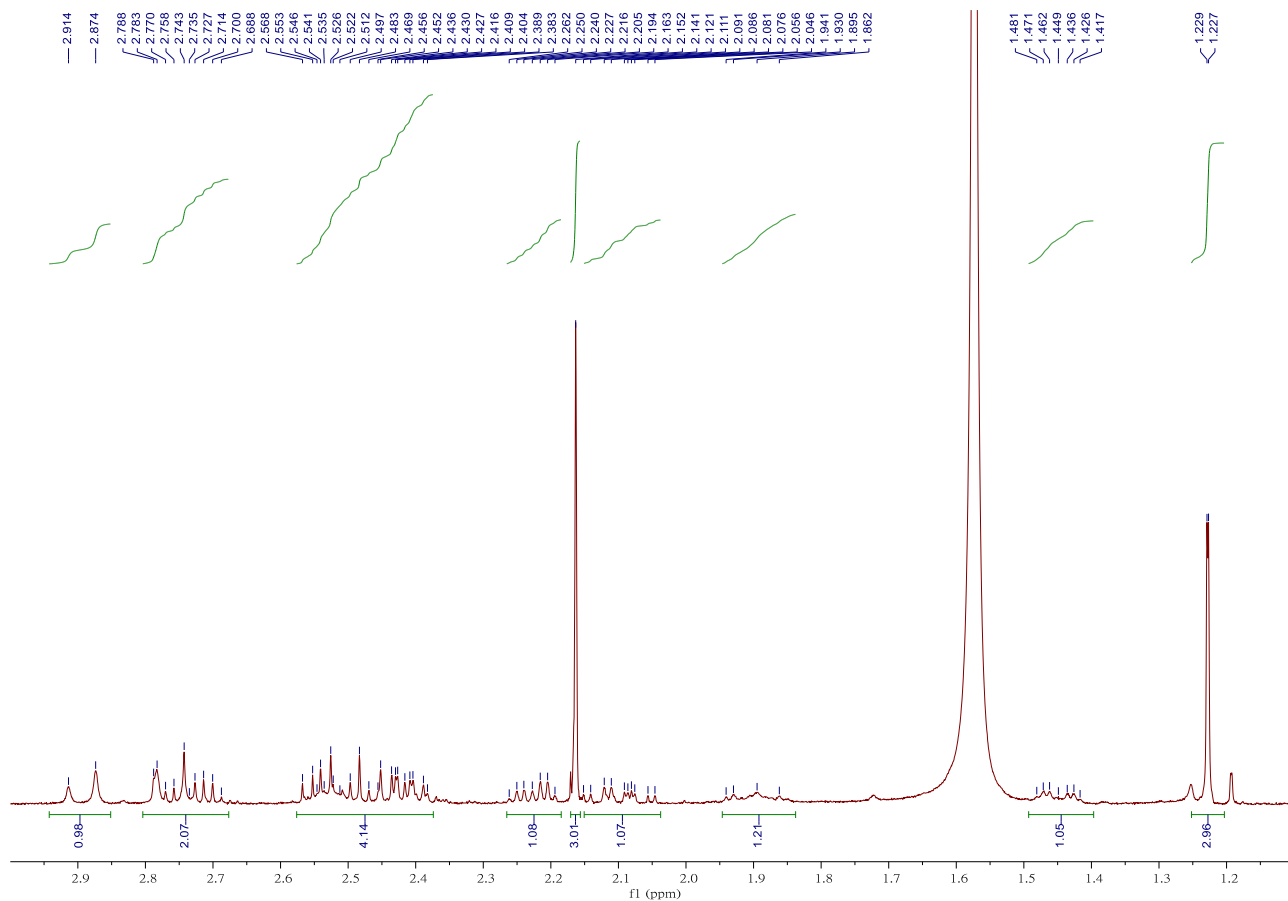

**Figure S14.** Expanded  $^1\text{H}$ -NMR spectrum (1.10~3.00 ppm) of compound **2**.

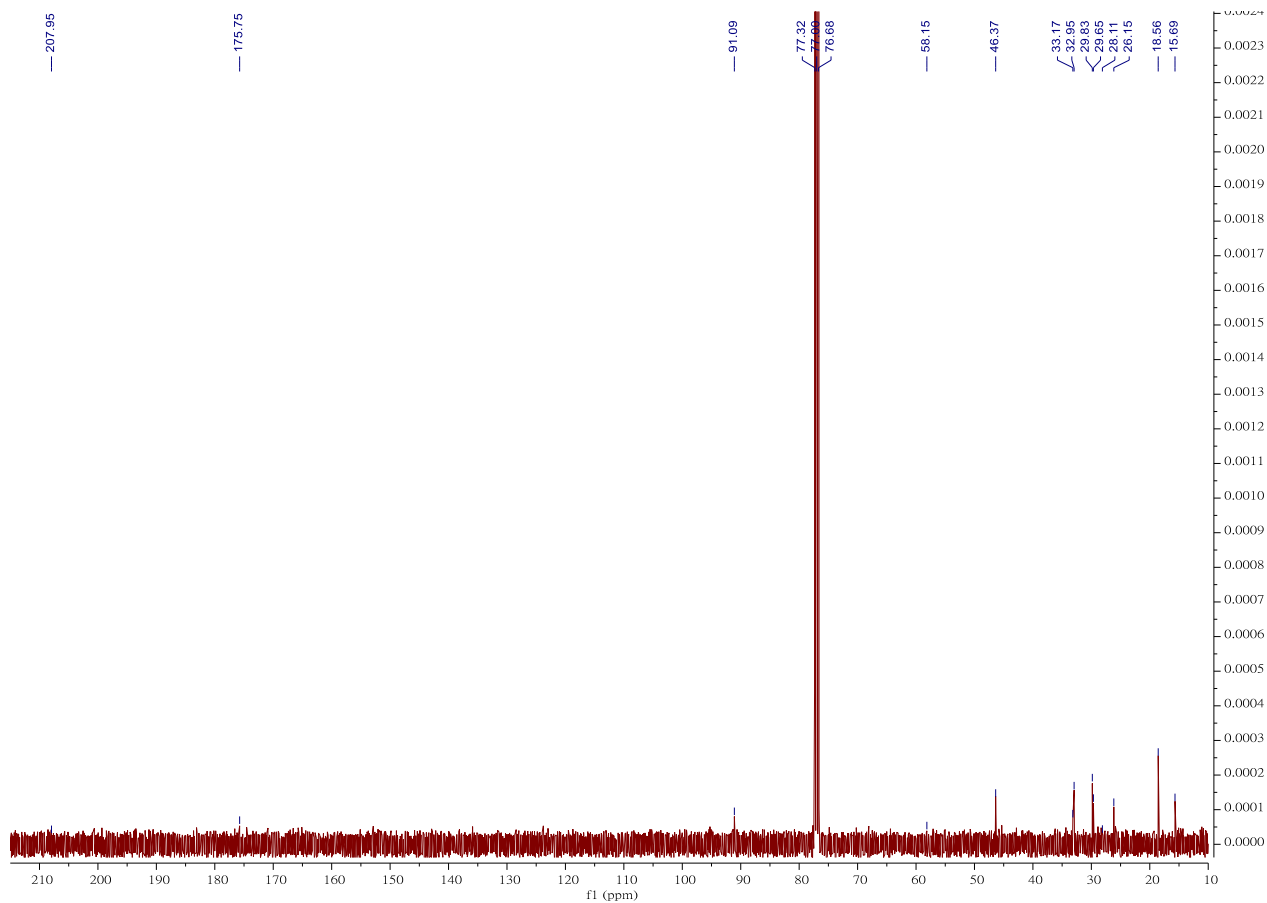

**Figure S15.**  $^{13}\text{C}$ -NMR spectrum (100 MHz,  $\text{CDCl}_3$ ) of compound **2**.

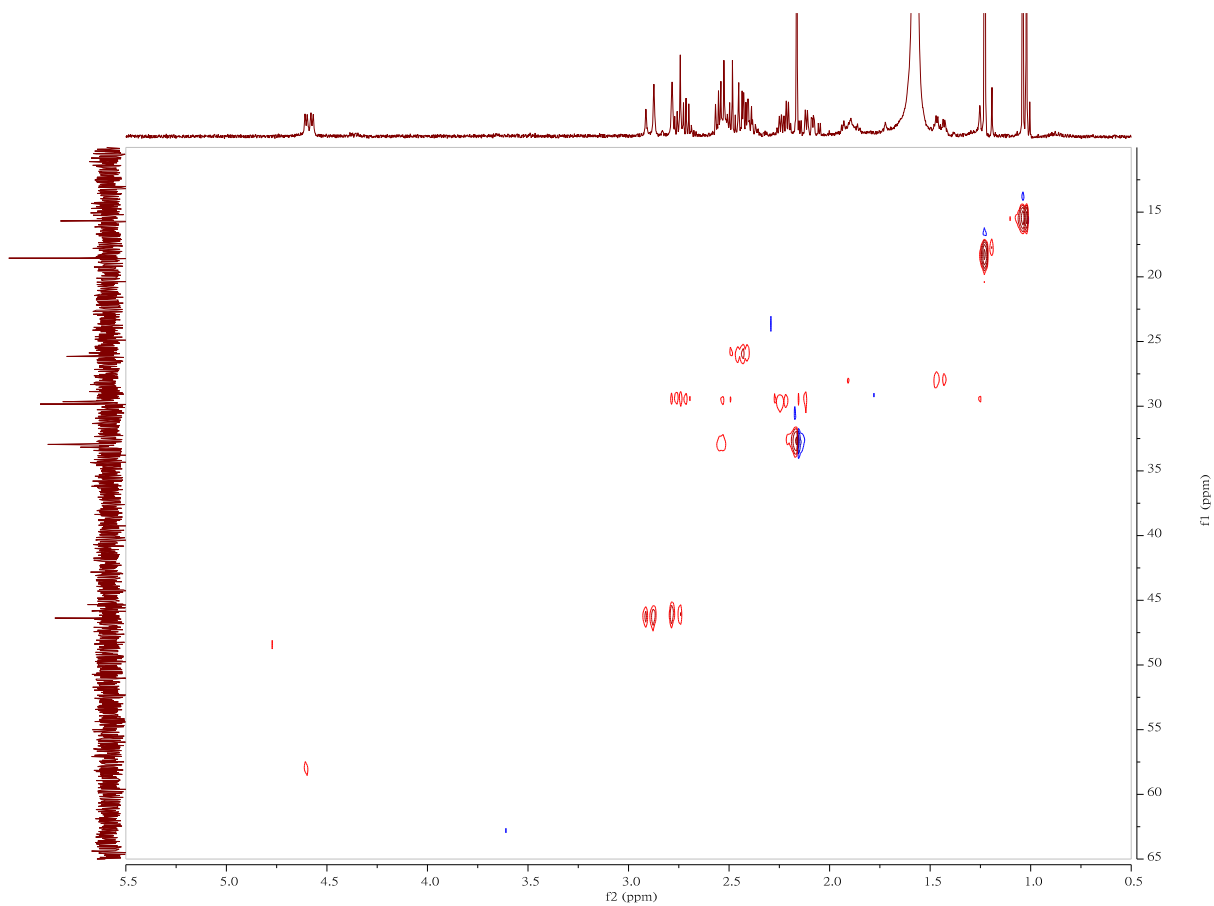

**Figure S16.** HSQC spectrum of compound 2.

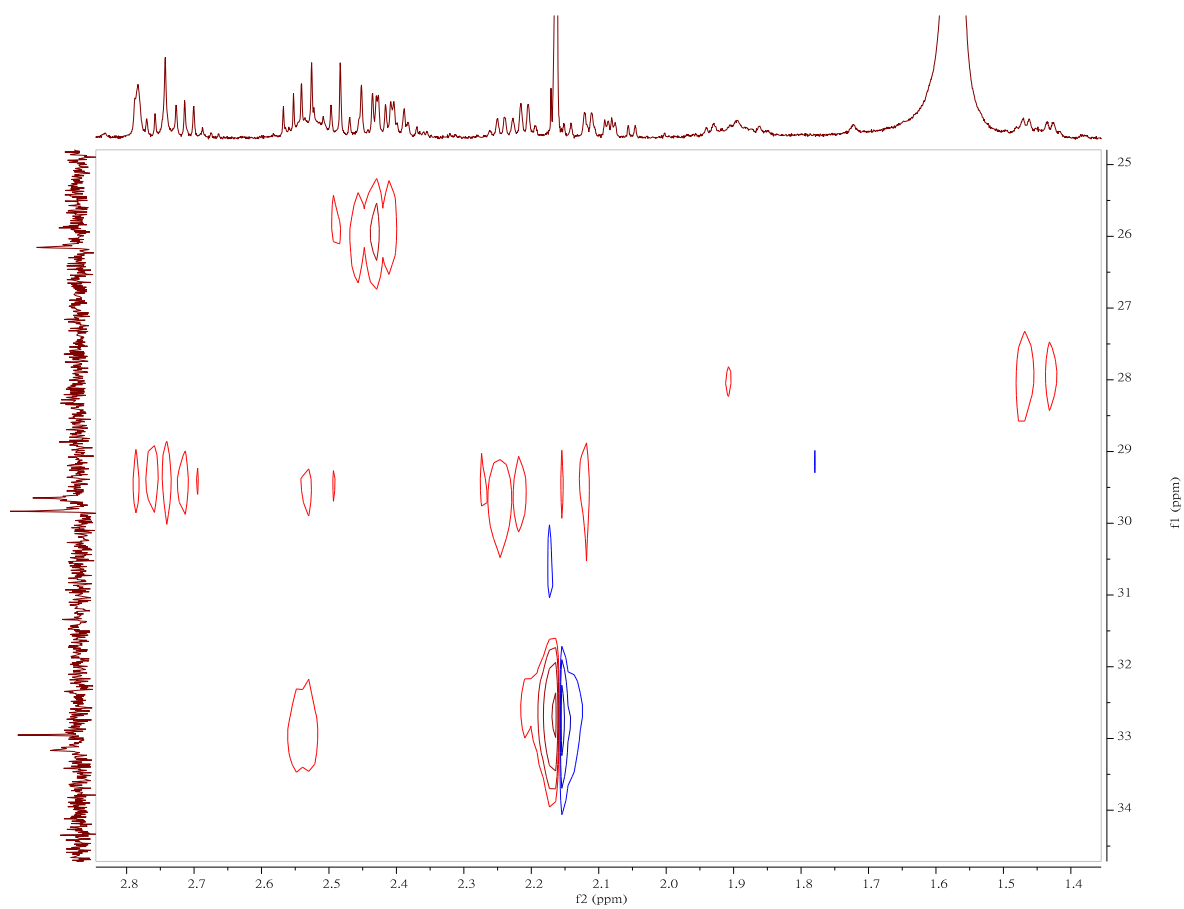

**Figure S17.** Expanded HSQC spectrum of compound 2.

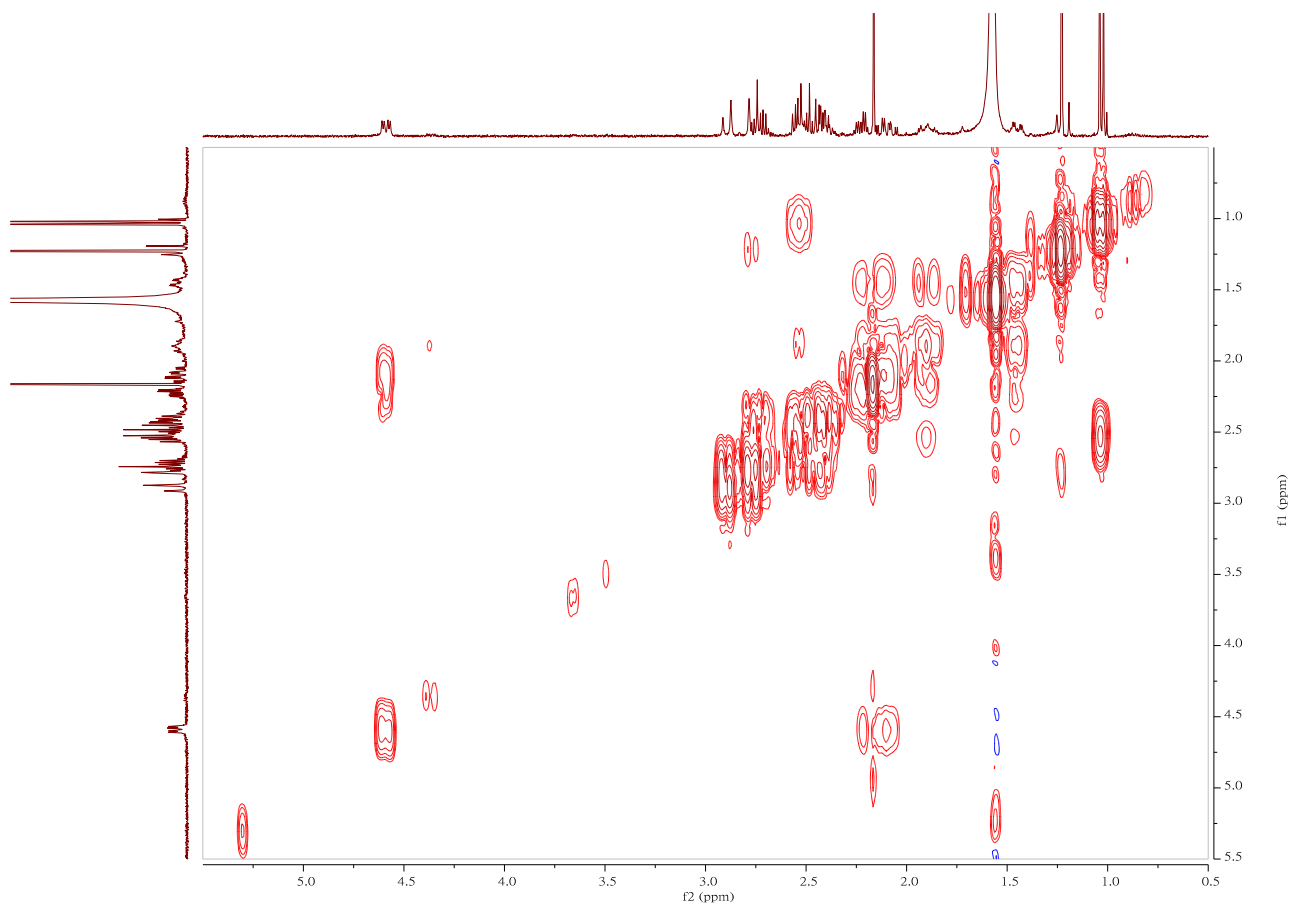

**Figure S18.**  $^1\text{H}$ - $^1\text{H}$  COSY spectrum of compound 2.

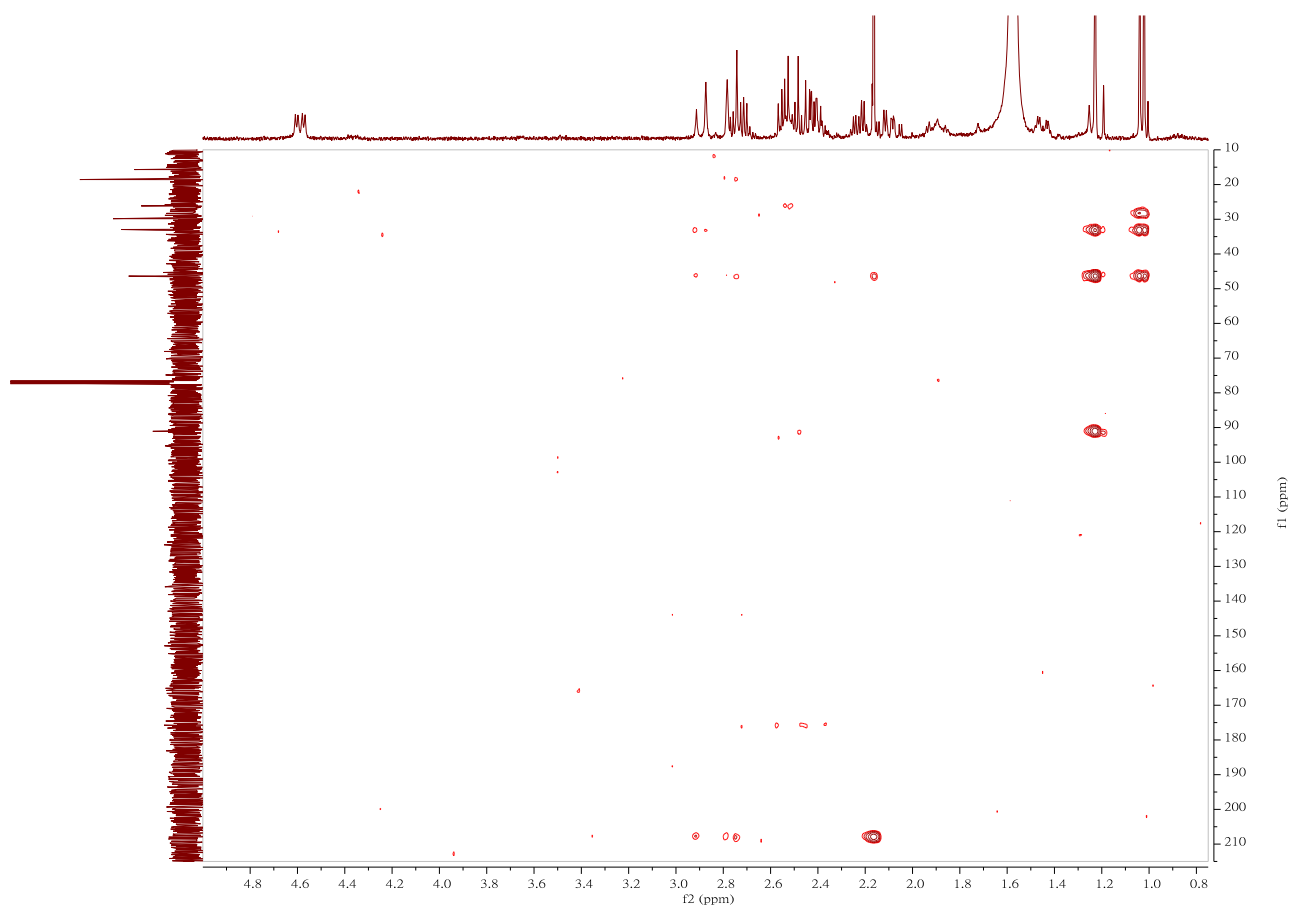

**Figure S19.** HMBC spectrum of compound 2.

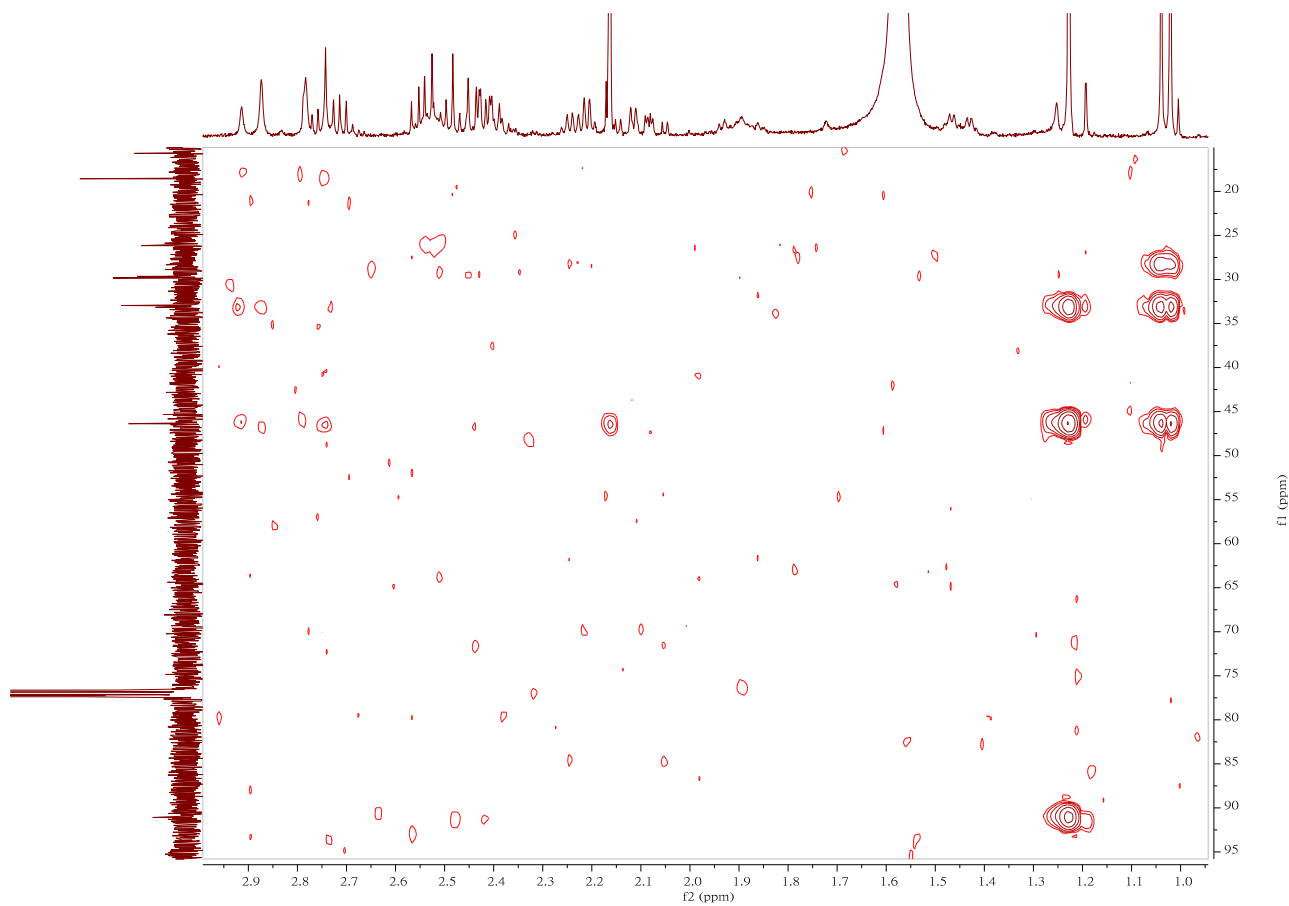

**Figure S20.** Expanded HMBC spectrum of compound **2**.

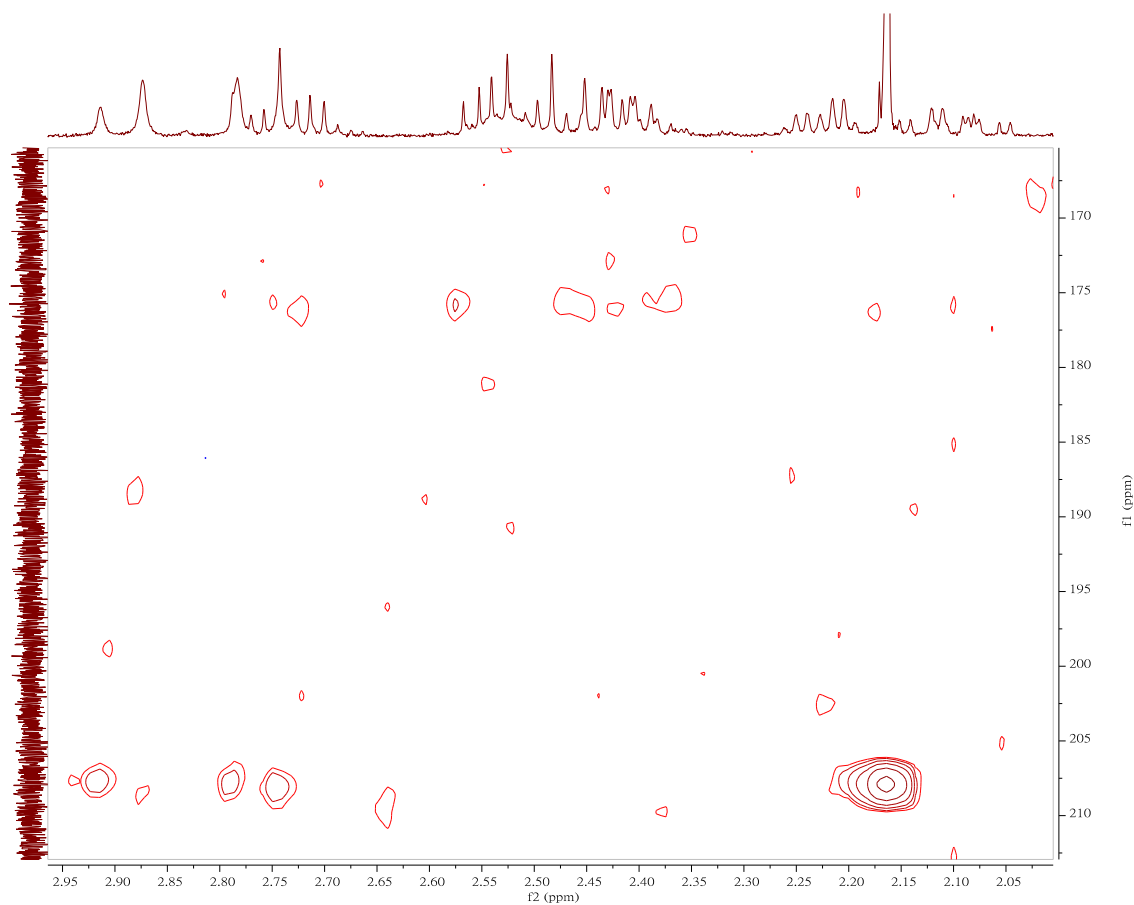

**Figure S21.** Expanded HMBC spectrum of compound **2**.

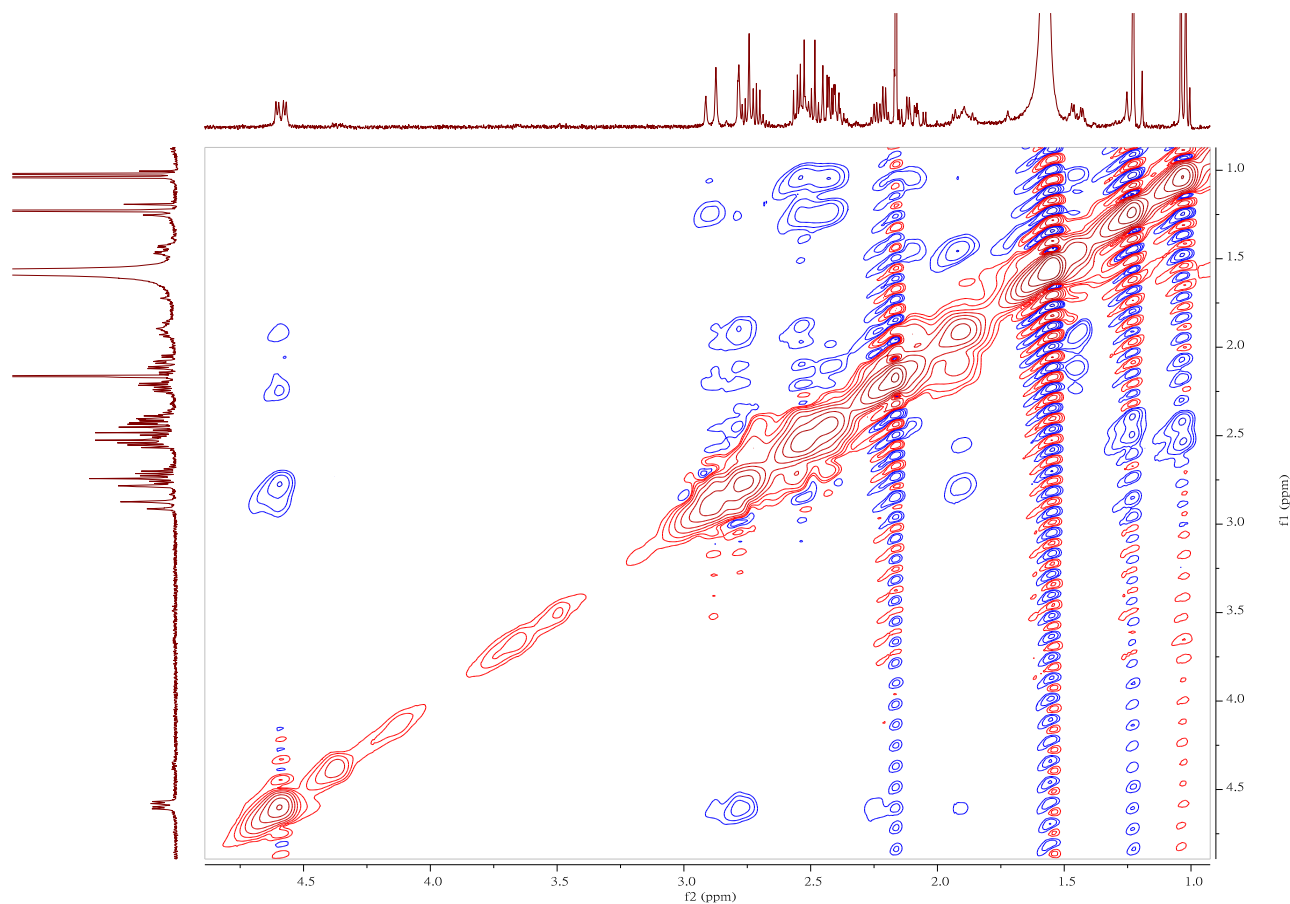

**Figure S22.** NOESY spectrum of compound **2**.

| Functional | Solvent? | Basis Set    | Type of Data      |
|------------|----------|--------------|-------------------|
| mPW1PW91   | PCM      | 6-311+G(d,p) | Shielding Tensors |
| Isomer 1   | Isomer 2 | Isomer 3     | Isomer 4          |
| Isomer 5   |          |              |                   |

  

| Isomer | DP4+  | 0.00%      | 0.00%      |
|--------|-------|------------|------------|
| C      | 207.9 | -33.9      | -32.4      |
| C      | 155.8 | 3.2        | 3.9        |
| C      | 91.1  | 91.8       | 94.9       |
| C      | 58.2  | 108.8      | 114.1      |
| C      | 46.4  | 131.9      | 137.7      |
| C      | 46.4  | 136.4      | 122.4      |
| C      | 33.2  | 147.8      | 146.6      |
| C      | 29.7  | 153.6      | 155.0      |
| C      | 33    | 152.5      | 152.8      |
| C      | 29.7  | 153.8      | 150.1      |
| C      | 28.1  | 156.1      | 155.0      |
| C      | 26.2  | 157.94     | 149.55     |
| C      | 18.6  | 167.10     | 170.20     |
| C      | 15.7  | 170.92     | 167.10     |
| H      | 4.59  | 26.77      | 27.21      |
| H      | 2.28  | 29.67      | 29.64      |
| H      | 2.08  | 29.64      | 29.21      |
| H      | 1.89  | 29.68      | 30.62      |
| H      | 1.45  | 30.37      | 30.17      |
| H      | 2.56  | 29.28      | 29.68      |
| H      | 2.74  | 29.07      | 29.22      |
| H      | 2.53  | 29.34      | 29.35      |
| H      | 2.48  | 29.49      | 29.39      |
| H      | 2.41  | 29.49      | 29.98      |
| H      | 2.89  | 28.81      | 28.36      |
| H      | 2.76  | 29.196066  | 29.9302849 |
| H      | 2.16  | 29.397153  | 29.4102052 |
| H      | 1.03  | 30.7940061 | 30.6952398 |
| H      | 1.28  | 30.6472398 | 30.7480349 |

| Functional       | Solvent? | Basis Set    | Type of Data      |
|------------------|----------|--------------|-------------------|
| mPW1PW91         | PCM      | 6-311+G(d,p) | Shielding Tensors |
|                  | Isomer 1 | Isomer 2     | Isomer 3          |
|                  | Isomer 4 | Isomer 5     | Isomer 6          |
| sDP4+ (H data)   | 100.00%  | 0.00%        | -                 |
| sDP4+ (C data)   | 99.98%   | 0.02%        | -                 |
| sDP4+ (all data) | 100.00%  | 0.00%        | -                 |
| uDP4+ (H data)   | 100.00%  | 0.00%        | -                 |
| uDP4+ (C data)   | 99.91%   | 0.09%        | -                 |
| uDP4+ (all data) | 100.00%  | 0.00%        | -                 |
| DP4+ (H data)    | 100.00%  | 0.00%        | -                 |
| DP4+ (C data)    | 100.00%  | 0.00%        | -                 |
| DP4+ (all data)  | 100.00%  | 0.00%        | -                 |

Isomer 1: **2-1R,4S,5R,6R**; Isomer 2: **2-1S,4S,5R,6R**.

**Figure S23.** DP4+ analysis result of **2-1R,4S,5R,6R** and **2-1S,4S,5R,6R**.

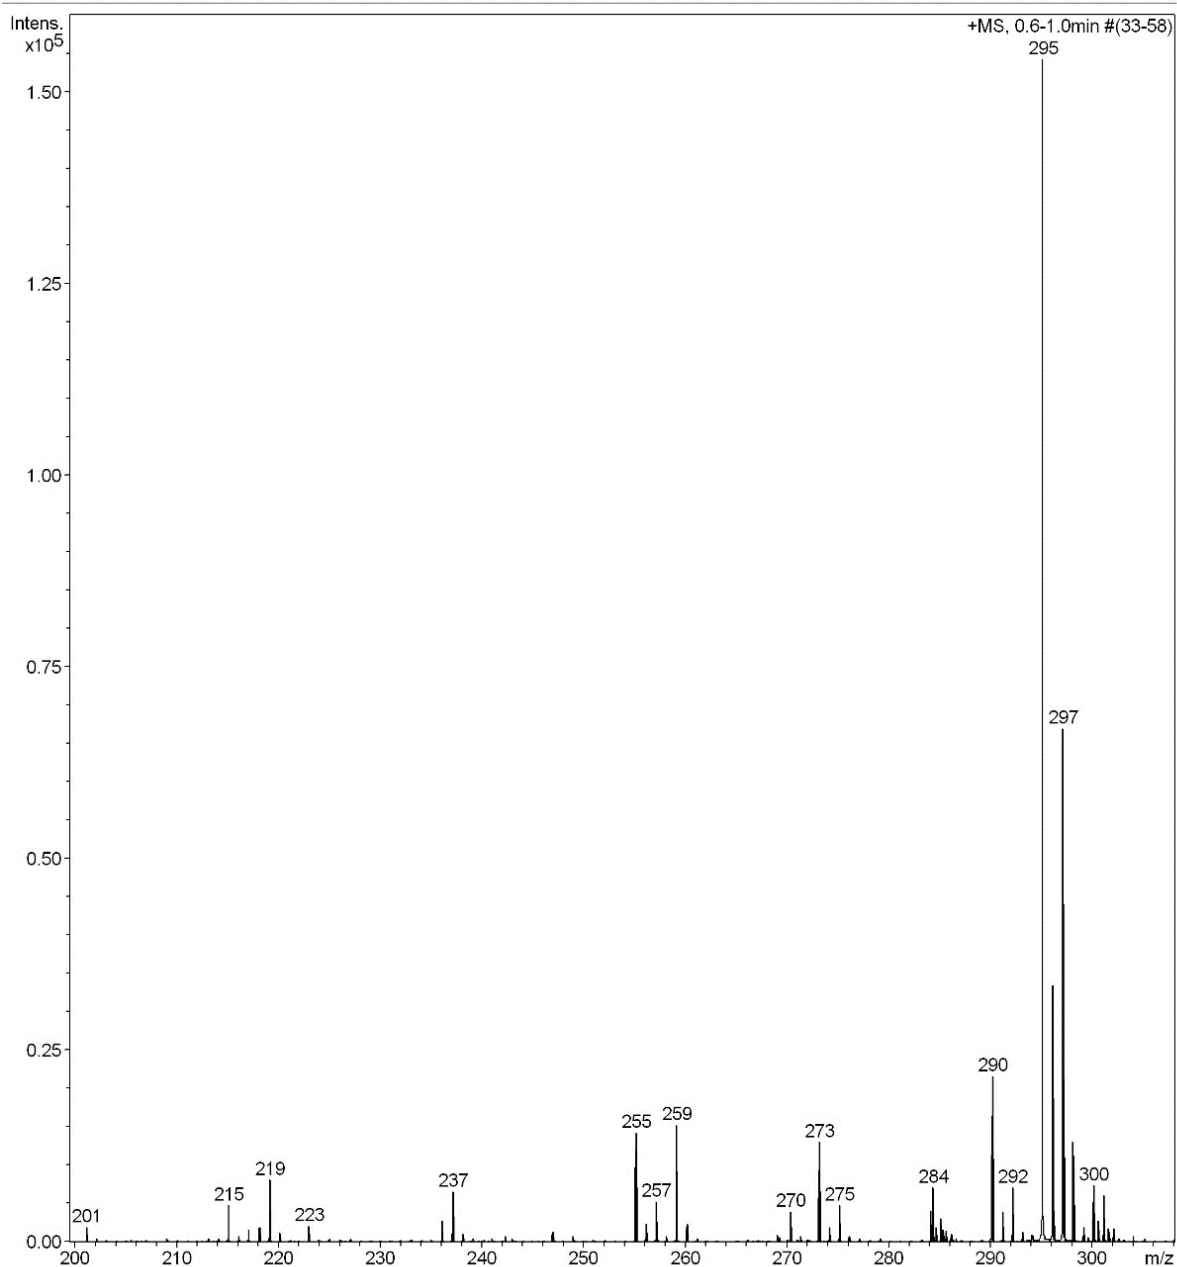

**Figure S24.** ESI-MS spectrum of compound **3**.

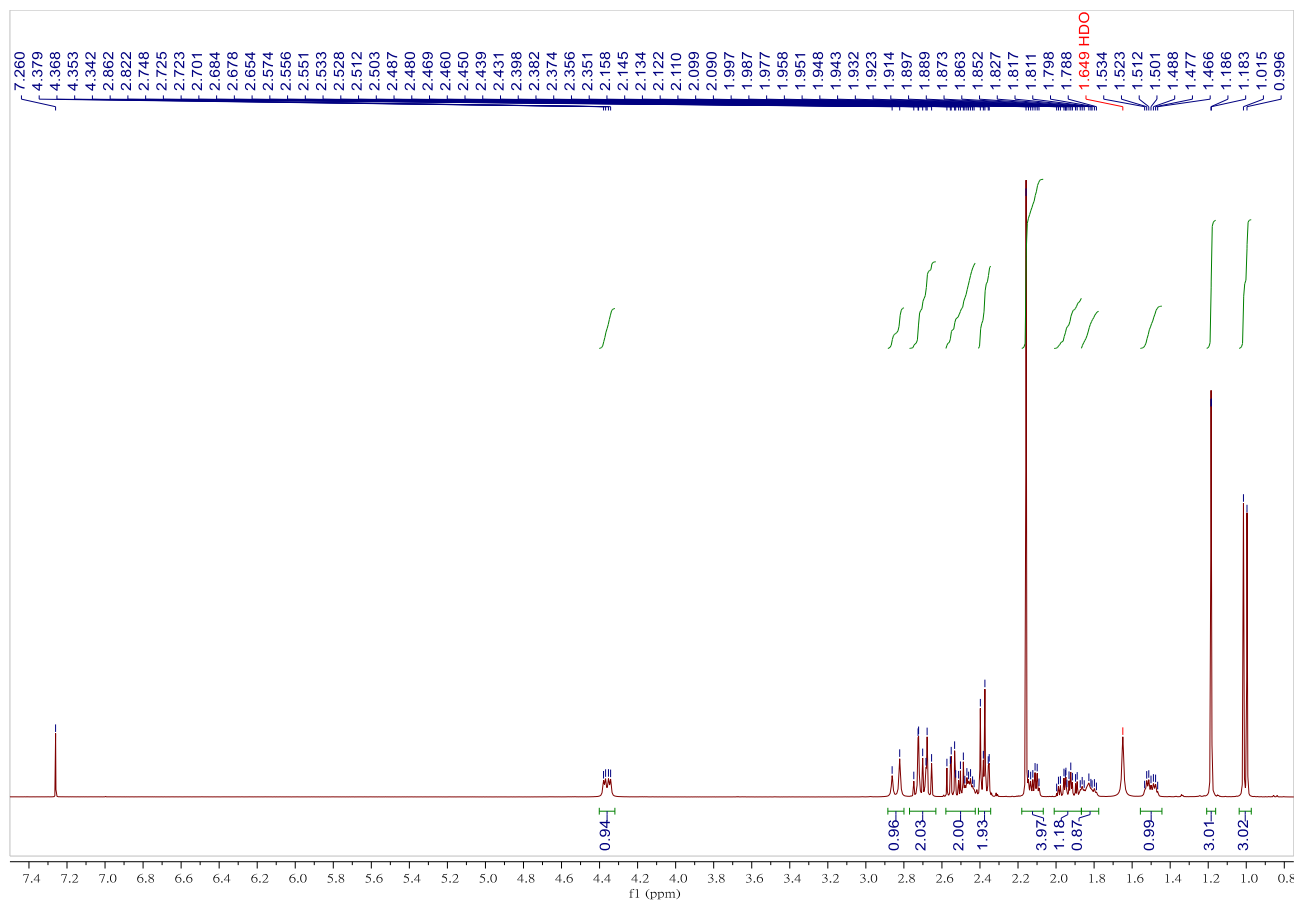

**Figure S25.**  $^1\text{H}$ -NMR spectrum (400 MHz,  $\text{CDCl}_3$ ) of compound **3**.

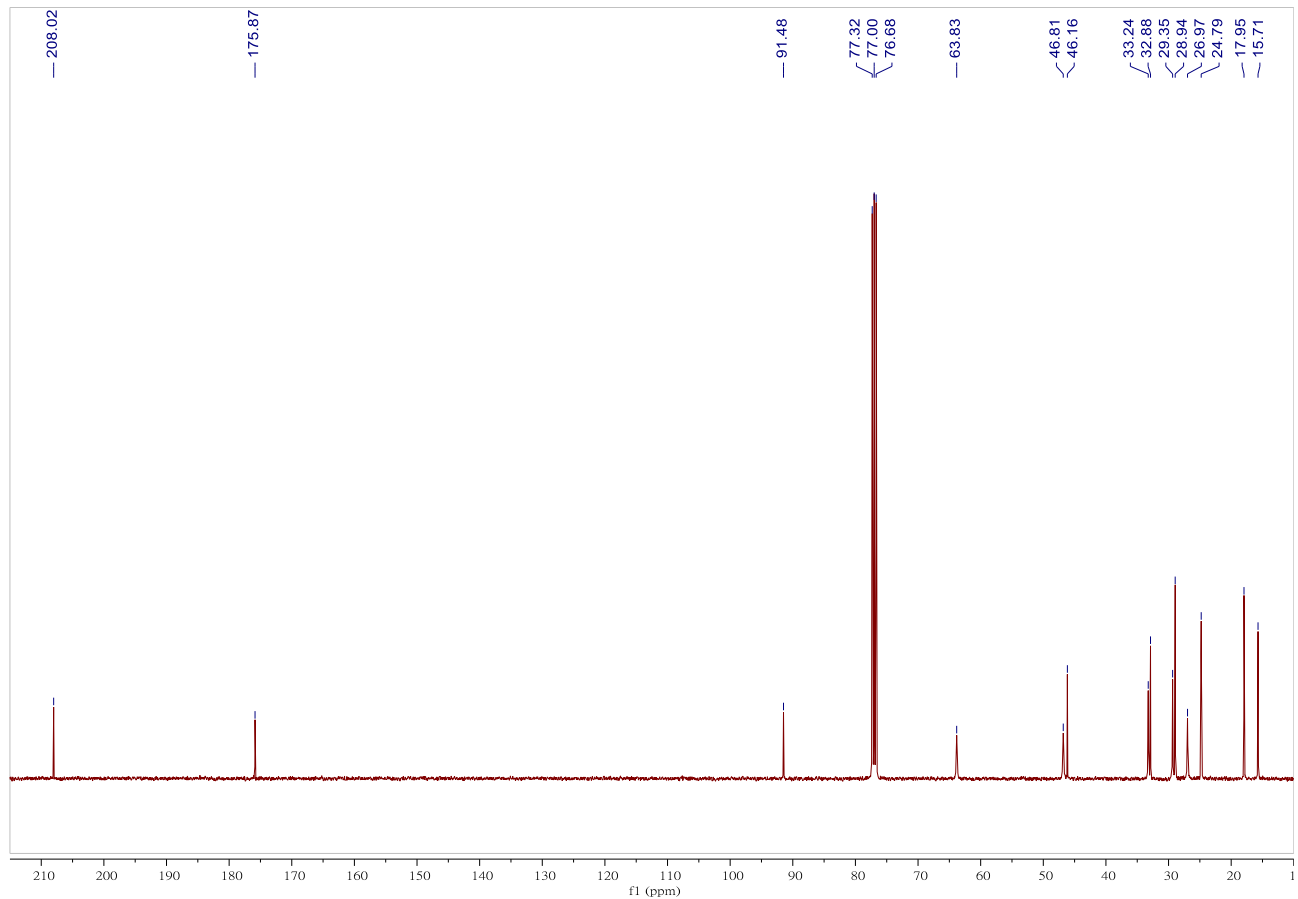

**Figure S26.**  $^{13}\text{C}$ -NMR spectrum (100 MHz,  $\text{CDCl}_3$ ) of compound **3**.

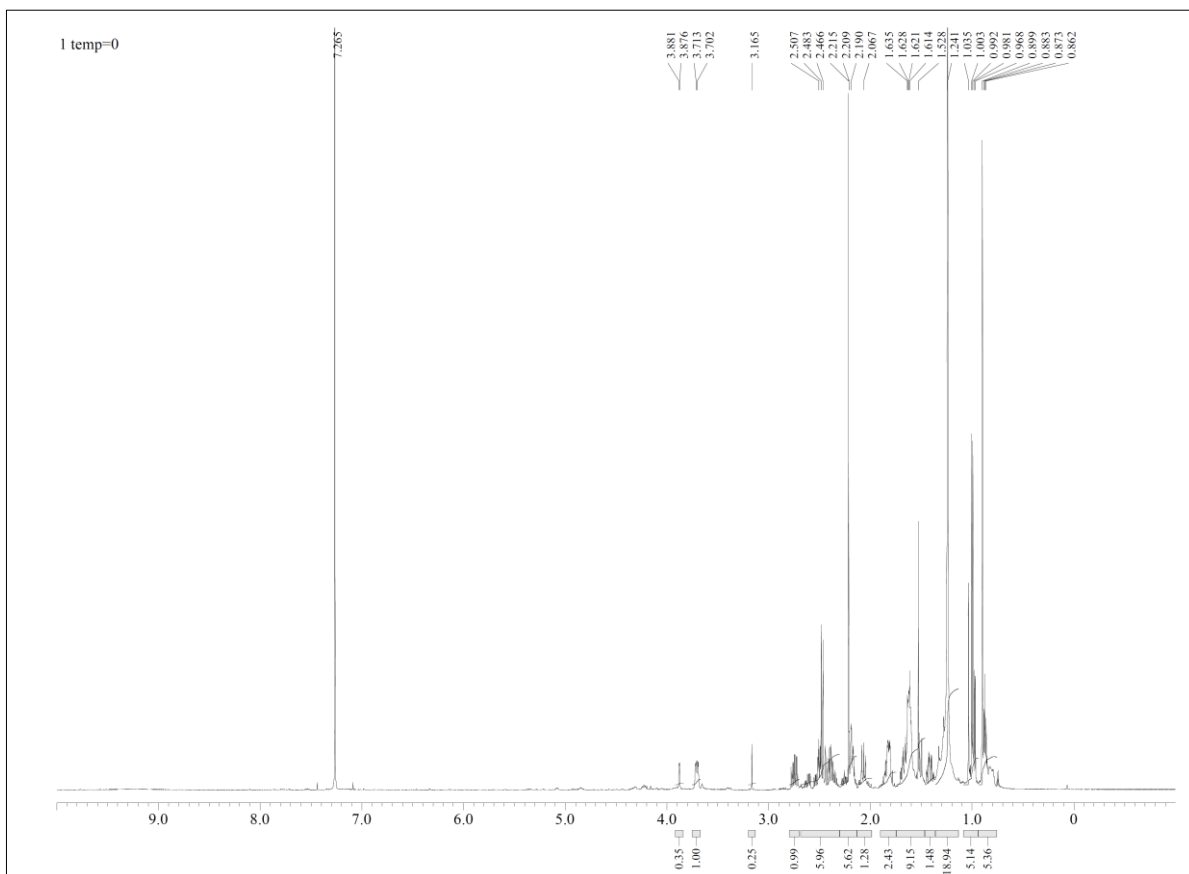

**Figure S27.** The  $^1\text{H}$ -NMR spectrum of **1** at  $0^\circ\text{C}$ .

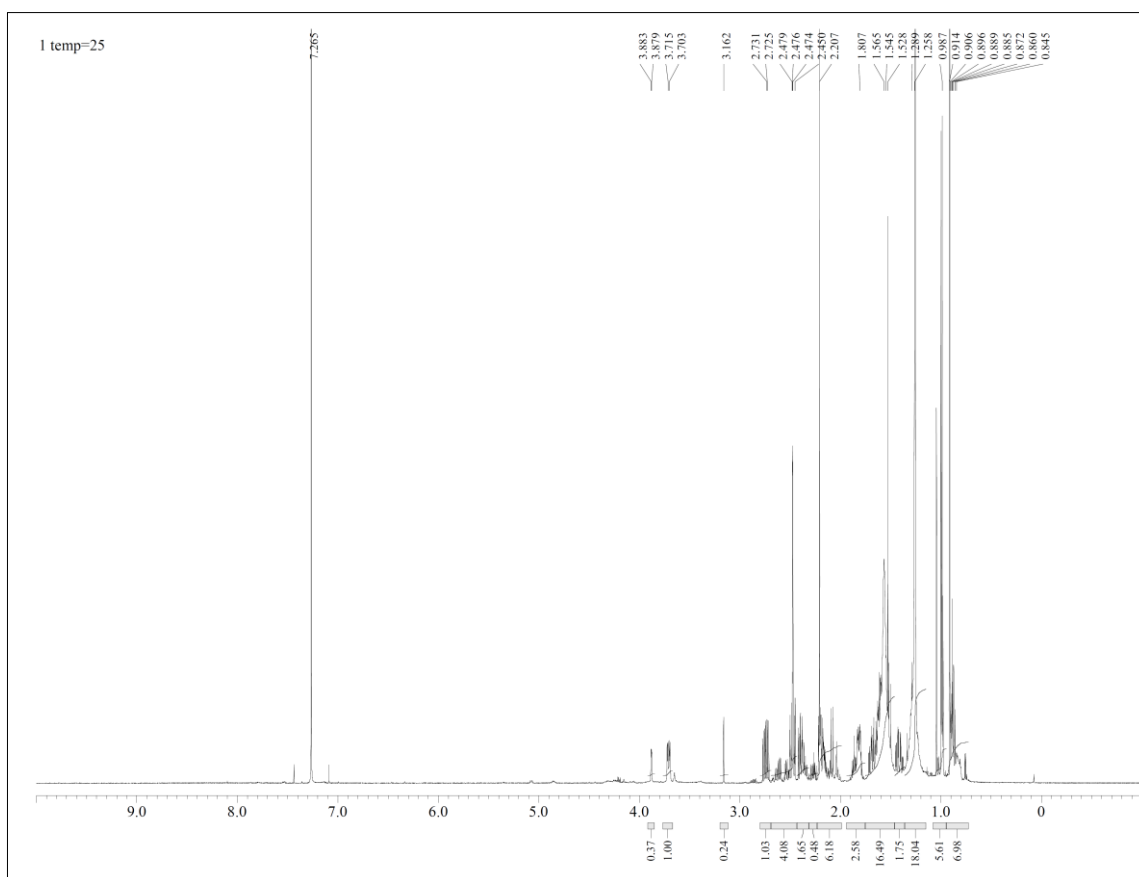

**Figure S28.** The  $^1\text{H}$ -NMR spectrum of **1** at  $25^\circ\text{C}$ .



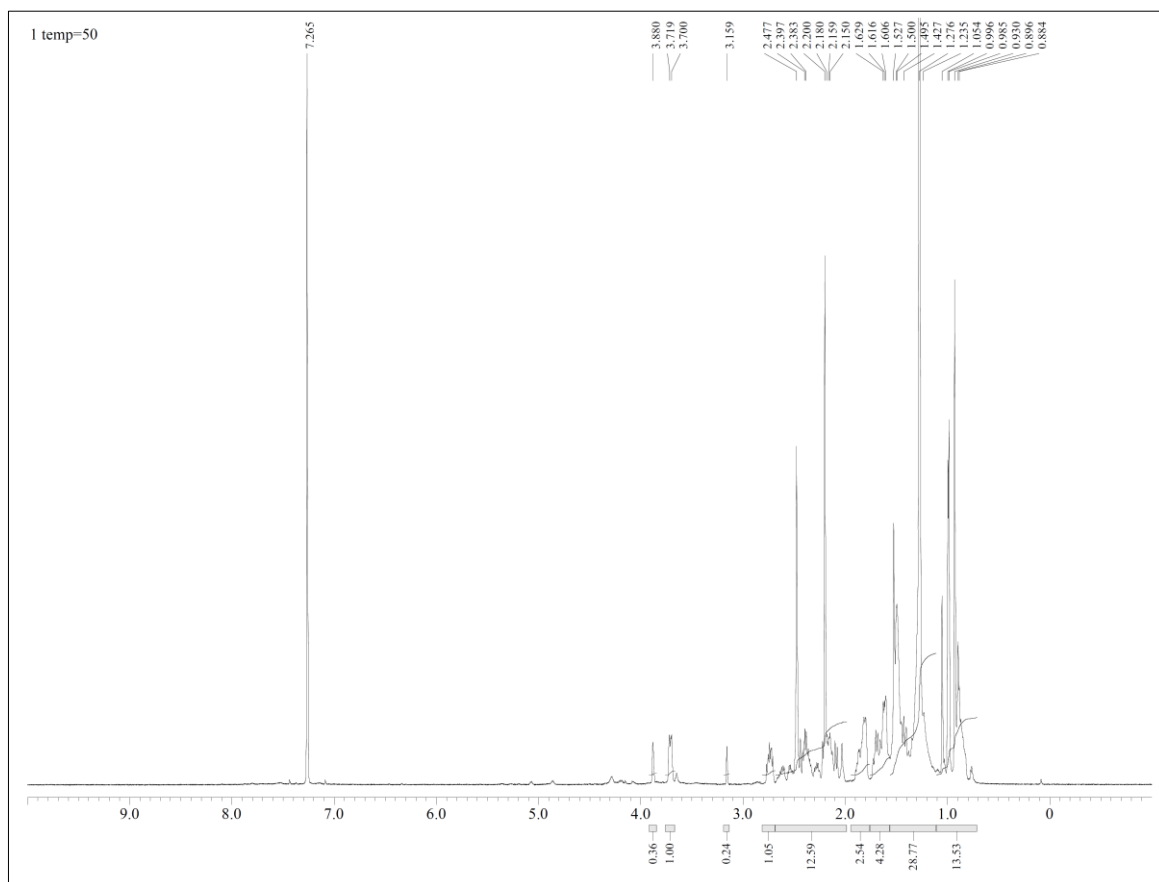

**Figure S29.** The  $^1\text{H}$ -NMR spectrum of **1** at 50°C.

**Table S1.** DP4+ analysis results of compounds **1** and **2**.

| Compound                | <b>1</b>                                                           |                                                                    | <b>2</b>                                                           |                                                                    |
|-------------------------|--------------------------------------------------------------------|--------------------------------------------------------------------|--------------------------------------------------------------------|--------------------------------------------------------------------|
|                         | Diastereomer 1<br>1-1 <i>S</i> ,4 <i>S</i> ,5 <i>R</i> ,6 <i>R</i> | Diastereomer 2<br>1-1 <i>R</i> ,4 <i>S</i> ,5 <i>R</i> ,6 <i>R</i> | Diastereomer 1<br>2-1 <i>R</i> ,4 <i>S</i> ,5 <i>R</i> ,6 <i>R</i> | Diastereomer 2<br>2-1 <i>S</i> ,4 <i>S</i> ,5 <i>R</i> ,6 <i>R</i> |
| sDP4+ (H data)          | 99.79%                                                             | 0.21%                                                              | 100.00%                                                            | 0.00%                                                              |
| sDP4+ (C data)          | 78.90%                                                             | 21.10%                                                             | 99.98%                                                             | 0.02%                                                              |
| <b>sDP4+ (All data)</b> | <b>99.94%</b>                                                      | <b>0.06%</b>                                                       | <b>100.00%</b>                                                     | <b>0.00%</b>                                                       |
| uDP4+ (H data)          | 99.45%                                                             | 0.55%                                                              | 100.00%                                                            | 0.00%                                                              |
| uDP4+ (C data)          | 95.89%                                                             | 4.11%                                                              | 99.91%                                                             | 0.09%                                                              |
| <b>uDP4+ (All data)</b> | <b>99.98%</b>                                                      | <b>0.02%</b>                                                       | <b>100.00%</b>                                                     | <b>0.00%</b>                                                       |
| DP4+ (H data)           | 100.00%                                                            | 0.00%                                                              | 100.00%                                                            | 0.00%                                                              |
| DP4+ (C data)           | 98.87%                                                             | 1.13%                                                              | 100.00%                                                            | 0.00%                                                              |
| <b>DP4+ (All data)</b>  | <b>100.00%</b>                                                     | <b>0.00%</b>                                                       | <b>100.00%</b>                                                     | <b>0.00%</b>                                                       |

**Table S2.** Experimental and calculated specific optical rotation values of compounds **1** and **2**.

|                                                                | Cald. value <sup>a</sup> | Exp. value |
|----------------------------------------------------------------|--------------------------|------------|
| Exp. <b>1</b> <sup>b</sup>                                     |                          | 185        |
| Cald. <b>1</b> -1 <i>S</i> ,4 <i>S</i> ,5 <i>R</i> ,6 <i>R</i> | 66                       |            |
| Cald. <b>1</b> -1 <i>R</i> ,4 <i>R</i> ,5 <i>S</i> ,6 <i>S</i> | -66                      |            |
| Exp. <b>2</b> <sup>c</sup>                                     |                          | 44         |
| Cald. <b>2</b> -1 <i>R</i> ,4 <i>S</i> ,5 <i>R</i> ,6 <i>R</i> | 12                       |            |
| Cald. <b>2</b> -1 <i>S</i> ,4 <i>R</i> ,5 <i>S</i> ,6 <i>S</i> | -12                      |            |

<sup>a</sup> Solvent phase in CHCl<sub>3</sub>; <sup>b</sup>[ $\alpha$ ]<sub>D</sub><sup>25</sup> (*c* 0.001, CHCl<sub>3</sub>); <sup>c</sup>[ $\alpha$ ]<sub>D</sub><sup>22</sup> (*c* 0.015, CHCl<sub>3</sub>)

**Table S3.** Optimized conformational search results of **1**.

|   | 3D structures of <b>1-1R,4S,5R,6R</b>                                               | Relative energy (KJ/mol) | Boltzmann distribution |
|---|-------------------------------------------------------------------------------------|--------------------------|------------------------|
| 1 | 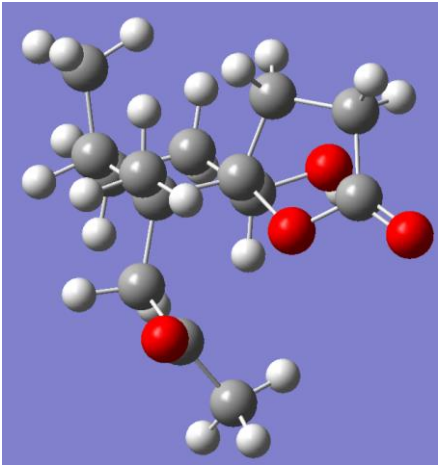   | 0.000000                 | 32.96%                 |
| 2 |   | 0.305770                 | 19.67%                 |
| 3 |  | 0.312200                 | 19.46%                 |
| 4 |  | 0.508900                 | 13.96%                 |

|   |                                                                                     |                          |                        |
|---|-------------------------------------------------------------------------------------|--------------------------|------------------------|
| 5 | 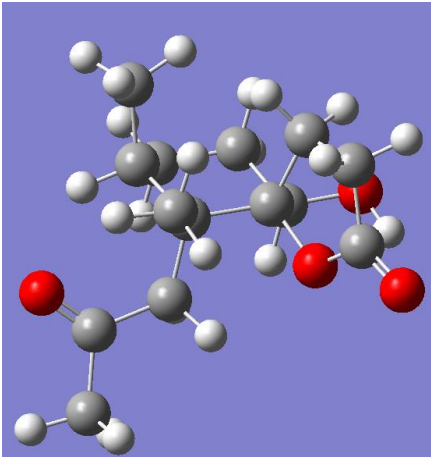   | 0.508980                 | 13.95%                 |
|   | 3D structures of 1-1 <i>S</i> ,4 <i>S</i> ,5 <i>R</i> ,6 <i>R</i>                   | Relative energy (KJ/mol) | Boltzmann distribution |
| 1 |   | 0.000000                 | 15.57%                 |
| 2 |  | 0.030420                 | 14.79%                 |
| 3 |  | 0.135140                 | 12.39%                 |

|   |                                                                                     |          |        |
|---|-------------------------------------------------------------------------------------|----------|--------|
| 4 | 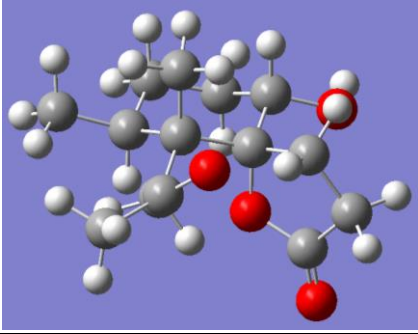   | 0.211430 | 10.89% |
| 5 |    | 0.278060 | 9.73%  |
| 6 |   | 0.315970 | 9.13%  |
| 7 |  | 0.365190 | 8.40%  |
| 8 |  | 0.473250 | 7.00%  |

|    |                                                                                   |          |       |
|----|-----------------------------------------------------------------------------------|----------|-------|
| 9  | 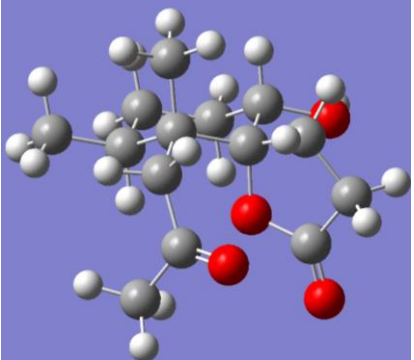 | 0.539540 | 6.26% |
| 10 |  | 0.581580 | 5.83% |

**Table S4.** Optimized conformational search results of **2**.

|   | 3D structures of <b>2-1R,4S,5R,6R</b>                                               | Relative energy (KJ/mol) | Boltzmann distribution |
|---|-------------------------------------------------------------------------------------|--------------------------|------------------------|
| 1 | 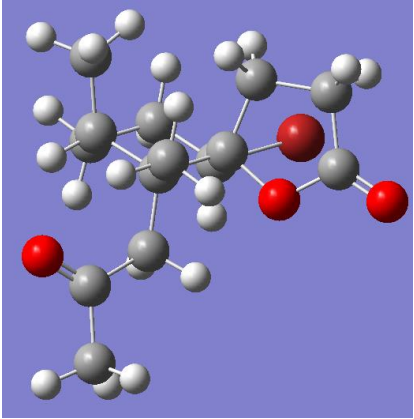   | 0.000000                 | 21.27%                 |
| 2 |   | 0.001030                 | 21.23%                 |
| 3 |  | 0.107180                 | 17.75%                 |
| 4 |  | 0.158220                 | 16.28%                 |

|                                                                   |                                                                                     |                          |                        |
|-------------------------------------------------------------------|-------------------------------------------------------------------------------------|--------------------------|------------------------|
| 5                                                                 | 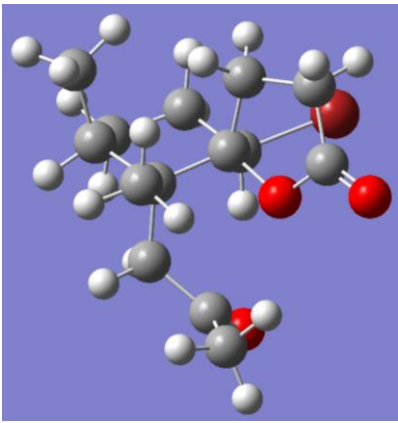   | 0.303900                 | 12.73%                 |
| 6                                                                 |   | 0.404970                 | 10.73%                 |
| 3D structures of 2-1 <i>S</i> ,4 <i>S</i> ,5 <i>R</i> ,6 <i>R</i> |                                                                                     | Relative energy (KJ/mol) | Boltzmann distribution |
| 1                                                                 |  | 0.000000                 | 23.94%                 |
| 2                                                                 |  | 0.012130                 | 23.45%                 |



|   |                                                                                    |          |        |
|---|------------------------------------------------------------------------------------|----------|--------|
| 3 |   | 0.013190 | 23.41% |
| 4 |   | 0.263030 | 15.35% |
| 5 |  | 0.324280 | 13.84% |

**Table S5.** X-ray crystallographic data of compound **3**.

|                                   |                                                  |          |
|-----------------------------------|--------------------------------------------------|----------|
| Identification code               | ic21528                                          |          |
| Empirical formula                 | C <sub>14</sub> H <sub>21</sub> ClO <sub>3</sub> |          |
| Formula weight                    | 272.76                                           |          |
| Temperature                       | 200(2) K                                         |          |
| Wavelength                        | 0.71073 Å                                        |          |
| Crystal system                    | Orthorhombic                                     |          |
| Space group                       | P2 <sub>1</sub> 2 <sub>1</sub> 2 <sub>1</sub>    |          |
| Unit cell dimensions              | a = 8.2367(2) Å                                  | α = 90°. |
|                                   | b = 9.9002(3) Å                                  | β = 90°. |
|                                   | c = 17.2237(5) Å                                 | γ = 90°. |
| Volume                            | 1404.51(7) Å <sup>3</sup>                        |          |
| Z                                 | 4                                                |          |
| Density (calculated)              | 1.290 Mg/m <sup>3</sup>                          |          |
| Absorption coefficient            | 0.270 mm <sup>-1</sup>                           |          |
| F(000)                            | 584                                              |          |
| Crystal size                      | 0.599 x 0.512 x 0.081 mm <sup>3</sup>            |          |
| Theta range for data collection   | 2.365 to 29.988°.                                |          |
| Index ranges                      | -11 ≤ h ≤ 11, -13 ≤ k ≤ 13, -24 ≤ l ≤ 24         |          |
| Reflections collected             | 39483                                            |          |
| Independent reflections           | 4100 [R(int) = 0.0666]                           |          |
| Completeness to theta = 25.242°   | 100.0 %                                          |          |
| Absorption correction             | Semi-empirical from equivalents                  |          |
| Max. and min. transmission        | 0.9705 and 0.6668                                |          |
| Refinement method                 | Full-matrix least-squares on F <sup>2</sup>      |          |
| Data / restraints / parameters    | 4100 / 0 / 172                                   |          |
| Goodness-of-fit on F <sup>2</sup> | 1.159                                            |          |
| Final R indices [I > 2σ(I)]       | R1 = 0.0460, wR2 = 0.1060                        |          |
| R indices (all data)              | R1 = 0.0621, wR2 = 0.1248                        |          |
| Absolute structure parameter      | -0.04(4)                                         |          |
| Extinction coefficient            | n/a                                              |          |
| Largest diff. peak and hole       | 0.228 and -0.382 e.Å <sup>-3</sup>               |          |
